# Supplementary material for: Controlled synthesis of conjugated polymers in dendritic mesoporous silica nanoparticles
Source: Royal Society of Chemistry journal article supplement (doi:10.1039/d1cc00338k), 2021-01-01
Supplement: d1cc00338k1.pdf [file d1cc00338k1.pdf]

## Supporting Information

### Controlled Synthesis of Conjugated Polymers in Dendritic

### Mesoporous Silica Nanoparticles

Yusen Wu, Jie Wang, Yanchao Zhu, Xiaowang Yu, Zhikun Shang, Yun Ding, Aiguo Hu\*

Shanghai Key Laboratory of Advanced Polymeric Materials, School of Materials Science and Engineering, East China University of Science and Technology, Shanghai 200237, China.

\* Corresponding Authors: [hagmhsn@ecust.edu.cn](mailto:hagmhsn@ecust.edu.cn).

## Materials and Methods

### Materials

Unless otherwise noted, all reagents were purchased from commercial sources and used without further purification. 2-bromo-3-hexylthiophene was purified by vacuum distillation at 120 °C before polymerization. N,N-dimethylacetamide (DMAc) and diisopropylethylamine (DIPEA) were distilled over calcium hydride before use.

### Methods

<sup>1</sup>H NMR (600 MHz) spectra were recorded in chloroform-*d* (CDCl<sub>3</sub>) on a Bruker ASCEND 600 NMR spectrometer. High-resolution transmission electron microscopic (HR-TEM) images were obtained on a JEM-2100 microscope (JEOL, Japan) at an acceleration voltage of 200 kV. Scanning transmission electron microscopic (STEM) images were obtained on a Talos F200X TEM at an acceleration voltage of 200 kV. Fluorescence spectra of conjugated polymers were obtained on Lumina (Thermo fisher, USA) and UV-vis spectra were collected by an Evolution 201 UV spectrophotometer (Thermo fisher, USA) at 25 °C. The number-averaged molecular weight ( $M_n$ ) and the polydispersity index (PDI) of conjugated polymers were determined on a WATERS 1515 equipped with a series of PS gel columns, using THF as an eluent at 40 °C with a PS calibration. The palladium contents in the catalysts or in the polymeric products were analyzed by ICP-AES on a Thermo Elemental IRIS 1000 instrument. Mass spectrometric experiments (MALDI-TOF) of conjugated polymers were performed on a Mass spectrometer 4800 plus MALDI-TOF/TOF MS Analyzer (AB Sciex, USA) equipped with a Nd:YAG laser emitting at 355 nm, and operated at an accelerating voltage of 20 kV in reflection mode. 4000 series Explorer and DATA Explorer (AB Sciex, USA) were used for data acquisition and processing. The extraction delay time was set to 450 ns. All mass spectra were collected by averaging the signals of 500 individual laser shots. The possibility coefficients chosen for simulated populations of each polymer chain in Figure 2c were: from  $P_1$  to  $P_9$  [1, 0.98, 0.93, 0.84, 0.7, 0.37, 0.22, 0.12, 0.08], and  $P_x$  were set to 0 when  $x > 9$ <sup>1</sup>. The high solution P3HT mass spectra were simulated by using pyMacroMS<sup>2</sup> (Figure S6).

### Synthesis of Pd@DMSNs catalysts

#### Preparation of DMSNs

According to the reported literature<sup>3</sup>, a mixture of cetyl-trimethylammonium tosylate (CTATos, 1.92 g), triethanolamine (0.347 g) and deionized water (100 ml) was stirred at 80 °C for 1 h. After the surfactant was completely dissolved, tetraethyl-orthosilicate (TEOS, 14.68 ml) was quickly added into the mixture, then stirred vigorously at 80 °C for another 2 h. The products were

filtered, washed three times with deionized water, and dried overnight in an oven at 80 °C under vacuum. In order to functionalize DMSNs with amino groups, the surfactant was removed by calcination at 550 °C for 6 h in a continuous air flow.

### Preparation of DMSNs-NH<sub>2</sub>

In a 100 ml round-bottom flask, a mixture of DMSNs (2.0 g), 3-aminopropyltriethoxysilane (APTES, 6.67 ml), and toluene (25 ml) was refluxed for 48 h. The mixture was filtered, washed with acetone and chloroform for three times respectively, and dried overnight in an oven at 60 °C under vacuum to yield the final product.

### Preparation of Pd@DMSNs

DMSNs-NH<sub>2</sub> (100 mg) was dispersed in deionized water (10 ml) and the mixture was sonicated for 15 min, then stirred vigorously at room temperature for 10 min. Then, H<sub>2</sub>PdCl<sub>4</sub> solution (0.6 ml, 10 mM in H<sub>2</sub>O) was added dropwise and further sonicated for 15 min, followed by stirring for 2 h. Freshly prepared NaBH<sub>4</sub> solution (1 ml, 1 M in H<sub>2</sub>O) was added dropwise to the mixture and further stirred for 2 h. The product was collected by centrifugation, washed three times with water and ethanol respectively, and dried overnight at 80 °C under vacuum.

### General procedure for the CSGP of conjugated polymers in Pd@DMSNs.

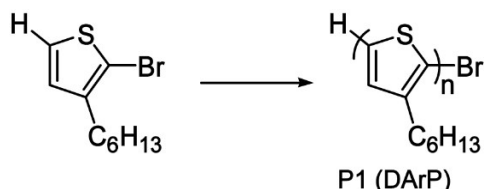

A mixture of 2-bromo-3-hexylthiophene (199.5  $\mu$ l, 1.0 mmol), Pd@DMSNs (5 mg, 0.033 % Pd), pivalic acid (102 mg, 1.0 mmol), K<sub>2</sub>CO<sub>3</sub> (415 mg, 3.0 mmol) and N,N-dimethylacetamide (DMAc, 2 ml) was added to a 10 ml sealed tube. After three freeze-pump-thaw cycles, the tube was sealed under nitrogen atmosphere and stirred at 120 °C for 120 h. After cooled to room temperature, the mixture was washed with THF (20 ml  $\times$  3). Then the THF solution was concentrated by evaporating and later added dropwise into stirred methanol (80 ml). The precipitate was rinsed with methanol for three times and dried under vacuum at room temperature overnight to obtain P3HT (129 mg, 78 %, denoted as **P1**). When a higher Pd loading (0.33%) was applied, the polymerization was complete in 15 h to give P3HT in 87% yield with similar molecular weight and PDI value.

Other conjugated polymers (**P2-P10**) were synthesized following a similar procedure that was briefly described below.

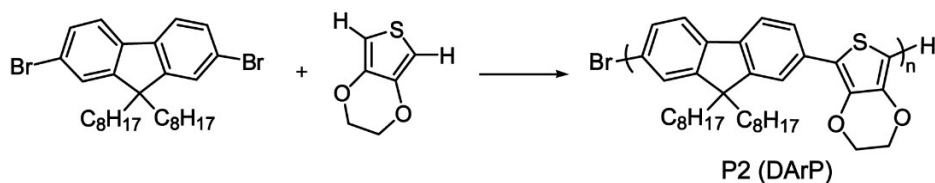

**P2**<sup>1</sup>: 9,9-Dioctyl-2,7-dibromofluorene (126.4 mg, 0.23 mmol), 3,4-ethylenedioxythiophene (24.6  $\mu$ l, 0.23 mmol), Pd@DMSNs (5 mg, 0.072 % Pd), pivalic acid (23.5 mg, 0.23 mmol), KOAc (136 mg, 1.38 mmol) and DMAc (2 ml) were used during polymerization. The polymerization was carried out at 120 °C for 120 h to yield the product (88 mg, 73 %).

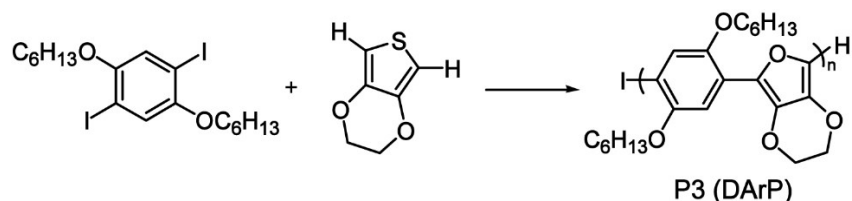

**P3**: 1,4-Diiodo-2,5-bis(hexyloxy)benzene<sup>4,5</sup> (106.0 mg, 0.2 mmol), 3,4-ethylenedioxythiophene (21.4  $\mu$ l, 0.2 mmol), Pd@DMSNs (5 mg, 0.082 % Pd), pivalic acid (20.4 mg, 0.2 mmol), K<sub>2</sub>CO<sub>3</sub> (165.6 mg, 1.2 mmol) and DMAc (2 ml) were used during polymerization. The polymerization was carried out at 100 °C for 120 h to yield the product (72 mg, 76 %).

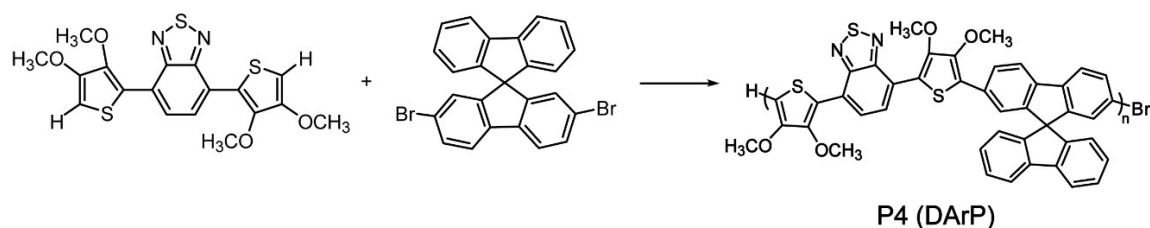

**P4**: 2,7-Dibromo-9,9'-spiro-bifluorene (23.8 mg, 0.05 mmol), 4,7-bis(3,4-dimethoxythiophen-2-yl) benzothiadiazole<sup>6</sup> (21.7 mg, 0.05 mmol), Pd@DMSNs (10 mg, 0.66 % Pd), pivalic acid (5.1 mg, 0.05 mmol), K<sub>2</sub>CO<sub>3</sub> (41.4 mg, 0.3 mmol) and DMAc (1 ml) were used during polymerization. The polymerization was carried out at 120 °C for 10 h and reprecipitated into ethyl acetate to yield the product (32 mg, 86%).

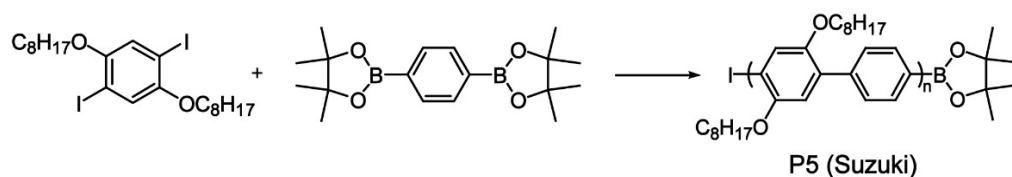

**P5**: 1,4-Diiodo-2,5-bis(2-ethylhexyloxy)benzene<sup>7,8</sup> (117.3 mg, 0.2 mmol), 1,4-Bis(4,4,5,5-tetramethyl-1,3,2-dioxaborolan-2-yl)benzene (66.0 mg, 0.2 mmol), Pd@DMSNs (5 mg, 0.082 %

Pd),  $K_2CO_3$  (165.6 mg, 1.2 mmol) and DMAc (2 ml) were used during polymerization. The polymerization was carried out at 100 °C for 120 h to yield the product (52 mg, 63 %).

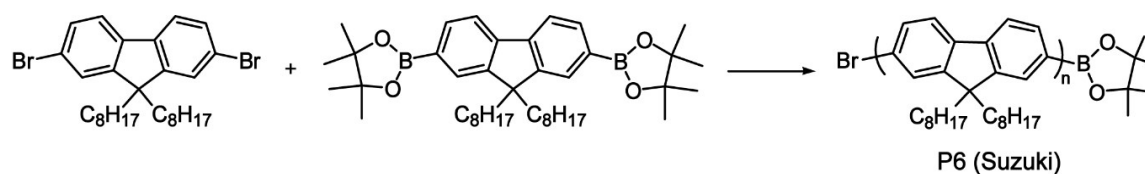

**P6:** 9,9-Dioctyl-2,7-dibromofluorene (109.7 mg, 0.2 mmol), 2,7-bis(4,4,5,5-tetramethyl-1,3,2-dioxaborolan-2-yl)-9,9-dioctylfluorene (128.5 mg, 0.2 mmol), Pd@DMSNs (5 mg, 0.082 % Pd),  $K_2CO_3$  (165.6 mg, 1.2 mmol) and DMAc (2 ml) were used during polymerization. The polymerization was carried out at 120 °C for 120 h to yield the product (116 mg, 75 %).

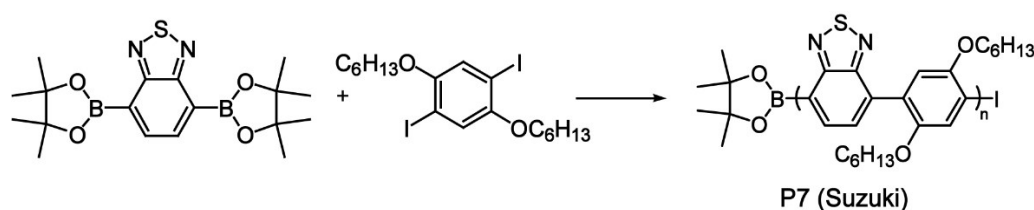

**P7:** 1,4-Diiodo-2,5-bis(hexyloxy)benzene (159.1 mg, 0.3 mmol), 2,1,3-Benzothiadiazole-4,7-bis(boronic acid pinacol ester) (116.4 mg, 0.3 mmol), Pd@DMSNs (50 mg, 0.55 % Pd),  $K_2CO_3$  (248.4 mg, 1.8 mmol) and DMAc (2 ml) were used during polymerization. The polymerization was carried out at 100 °C for 24 h to yield the product (71 mg, 56 %).

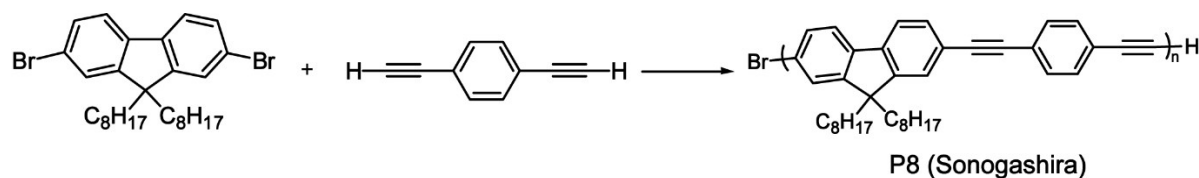

**P8:** 1,4-diethynylbenzene (25.2 mg, 0.2 mmol), 9,9-dioctyl-2,7-dibromofluorene (109.7 mg, 0.2 mmol), Pd@DMSNs (5 mg, 0.082 % Pd), DIPEA (0.21 ml, 1.2 mmol) and DMAc (1 ml) were used during polymerization. The polymerization was carried out at 80 °C for 120 h to yield the product (59 mg, 58 %).

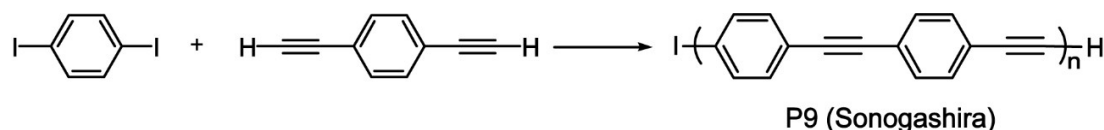

**P9:** 1,4-Diethynylbenzene (25.2 mg, 0.2 mmol), 1,4-diiodobenzene (66.0 mg, 0.2 mmol), Pd@DMSNs (5 mg, 0.082 % Pd), DIPEA (0.21 ml, 1.2 mmol) and DMAc (1 ml) were used during polymerization. The polymerization was carried out at 60 °C for 120 h to yield the product (26 mg, 67 %).

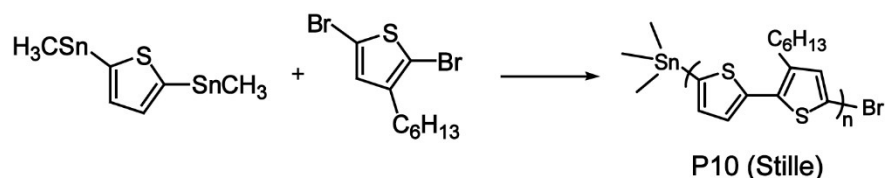

**P10:** 2,5-bis(trimethylstannyl)thiophene (82.0 mg, 0.2 mmol), 2,5-dibromo-hexylthiophene (42.9  $\mu$ l, 0.2 mmol), Pd@DMSNs (5 mg, 0.082 % Pd), and DMAc (1 ml) were used during polymerization. The polymerization was carried out at 120 °C for 120 h to yield the product (38 mg, 77 %).

### General procedure for the conventional SGP of conjugated polymers

The polymerizations were conducted with Pd(PPh<sub>3</sub>)<sub>2</sub>Cl<sub>2</sub> (10 mg) as the homogeneous catalyst. The procedures of classical SGP are similar with CSGP as mentioned above. The reaction time of classical SGP of P1, P2, P3, P4, P5, P6, P7, P8, P9 and P10 were set as 1.5 h, 2 h, 3 h, 3 h, 3 h, 1 h, 0.5 h, 1.5 h, 1 h and 0.5 h, respectively. It should be noted that the reaction times of the classical SGPs have also be prolonged to 24 h (or even longer) according to literature procedures. However, the formation of large amounts of precipitate made the fair comparison between classical SGP and CSGP impossible. Since the Flory's "equal reactivity" principle only applies where monomer, oligomers and all the polymer segments are well soluble in reaction mixture, the formation of any inhomogeneous species (like high polymers) would make the polymerization unpredictable and difficult to reproduce. Therefore, the reaction time for each classical SGP was set right before significant formation of precipitate.

### Procedure for the Recycling and Reusing Study of Pd@DMSNs Catalysts

The polymerization was carried out under the same reaction conditions as described above for **P1** with 0.33% Pd loading and 15 h of polymerization time. After each polymerization, the catalysts were washed with THF (20 ml  $\times$  6) and water (20 ml  $\times$  3), dried overnight at 80 °C under vacuum and then subjected for the next cycle. The catalysts were reused for 3 more cycles with no obvious deterioration on the catalytic activity or control over the molecular weight of the products.

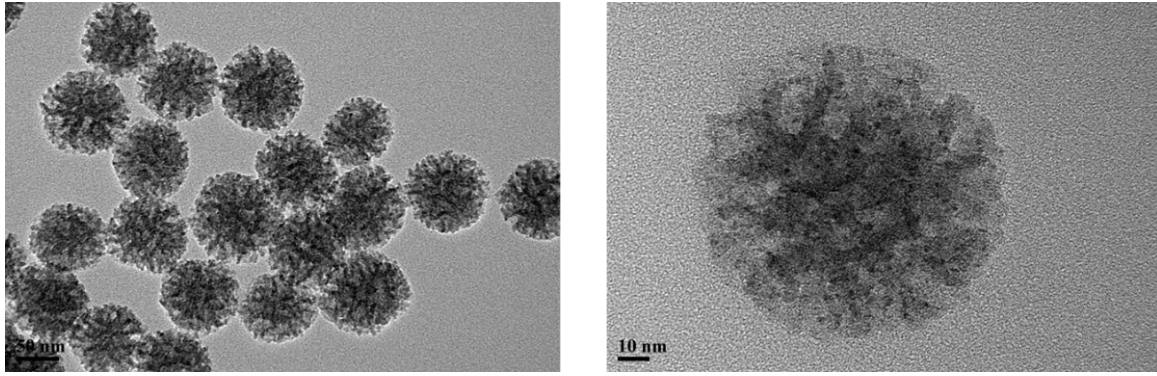

**Figure S1.** TEM images of Pd@DMSNs.

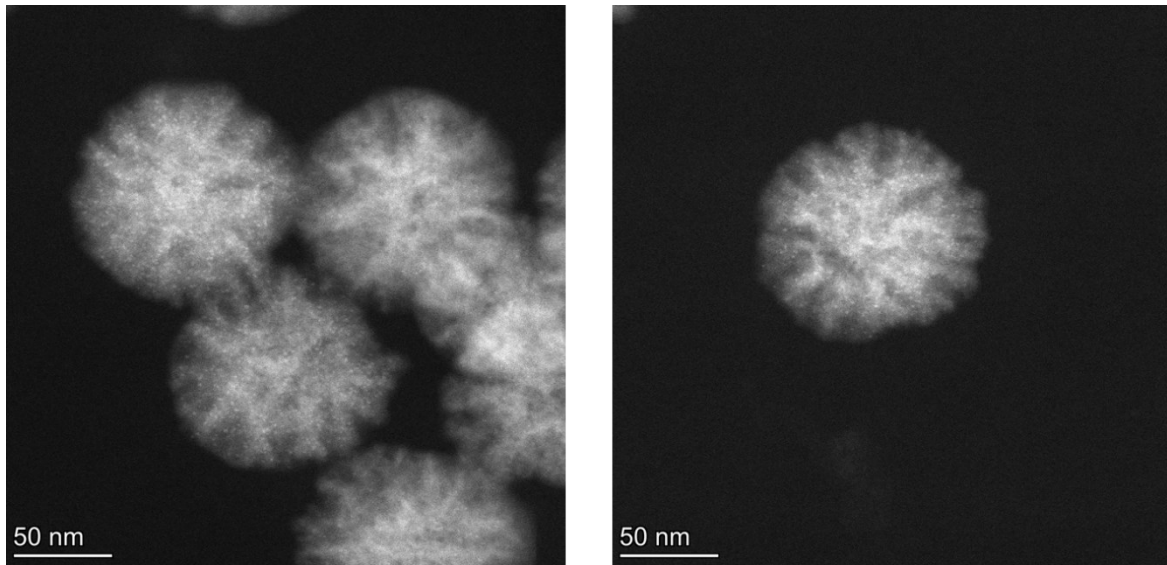

**Figure S2.** STEM images of Pd@DMSNs.

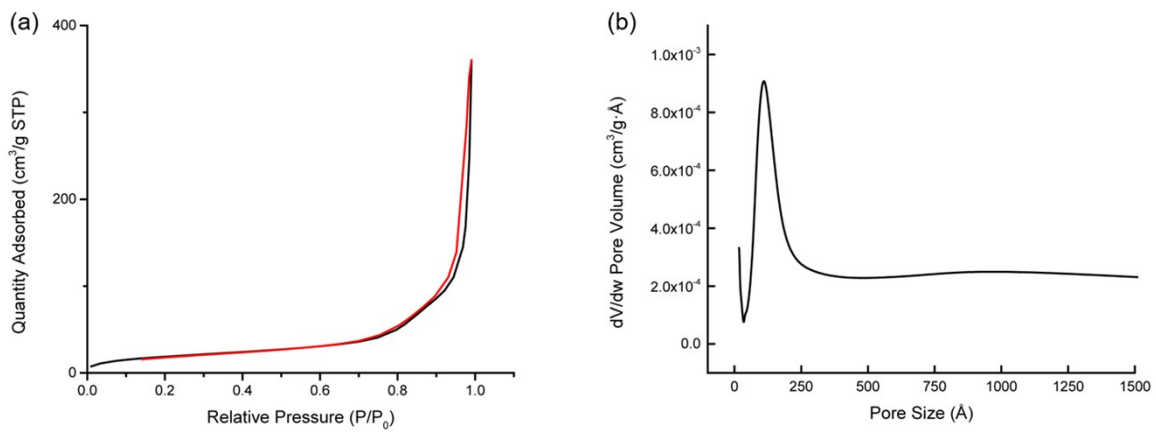

**Figure S3.** N<sub>2</sub> physisorption isotherms of the DMSNs (a) and their corresponding pore size distribution curve calculated by the BJH method (b).

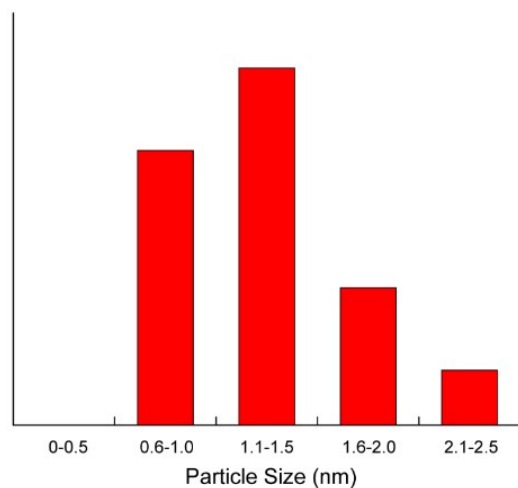

**Figure S4.** Particle size distribution of Pd in Pd@DMSNs as measured with TEM.

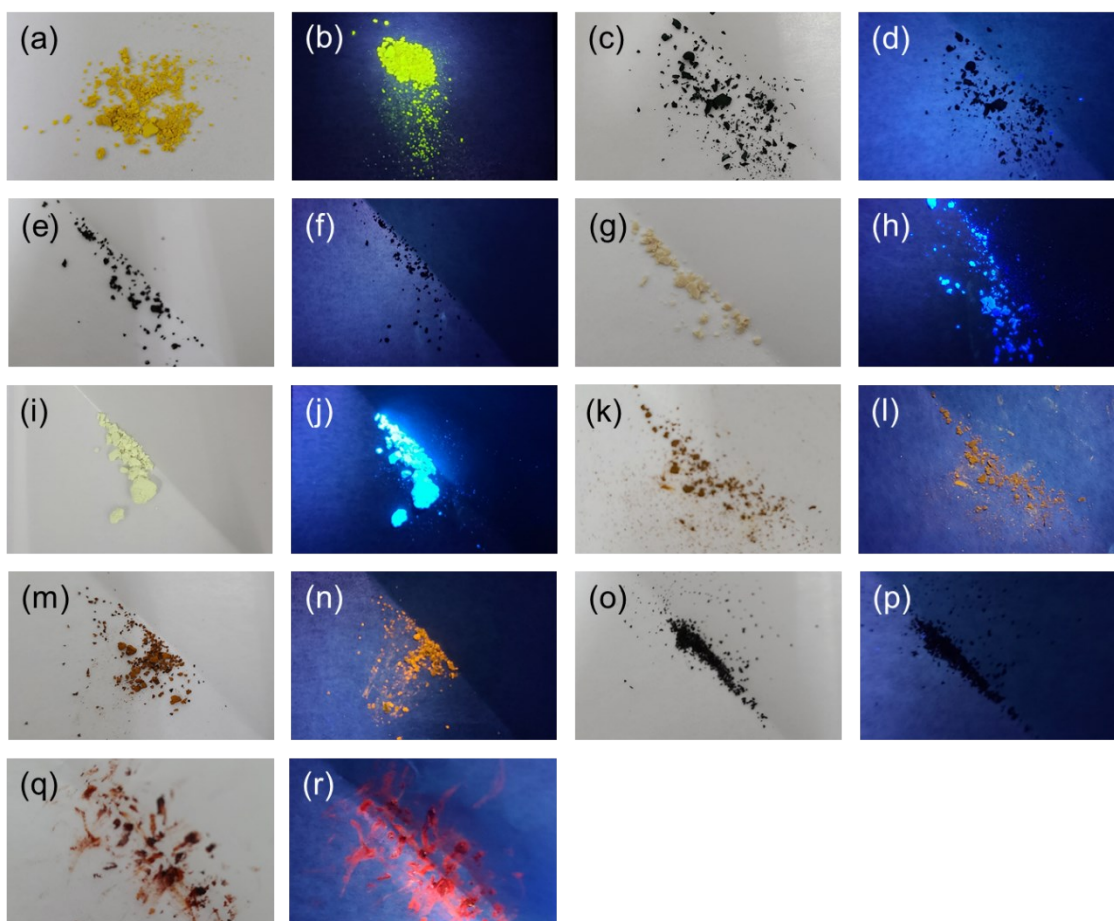

**Figure S5.** Optical (left) and fluorescence (right) images ( $\lambda_{\text{ex}} = 365 \text{ nm}$ ) of conjugated mesopolymer powders. (a, b) **P2**, (c, d) **P3**, (e, f) **P4**, (g, h) **P5**, (i, j) **P6**, (k, l) **P7**, (m, n) **P8**, (o, p) **P9**, (q, r) **P10**.



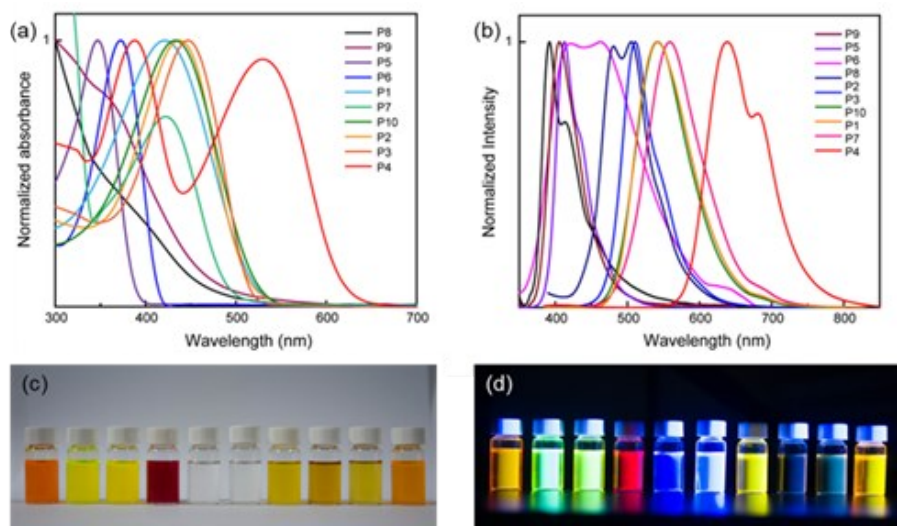

**Figure S6.** UV-Vis absorption spectra (a, 1  $\mu\text{g/ml}$ ) and fluorescence emission spectra of conjugated polymers in THF solutions (b, 1  $\mu\text{g/ml}$ ,  $\lambda_{\text{ex}} = 365 \text{ nm}$ , except for P5, P6, P8, and P9,  $\lambda_{\text{ex}}=330 \text{ nm}$ ). Optical images (c) and fluorescence images (d) of the conjugated polymer solutions in THF (2 mg/ml,  $\lambda_{\text{ex}}=365 \text{ nm}$ ).

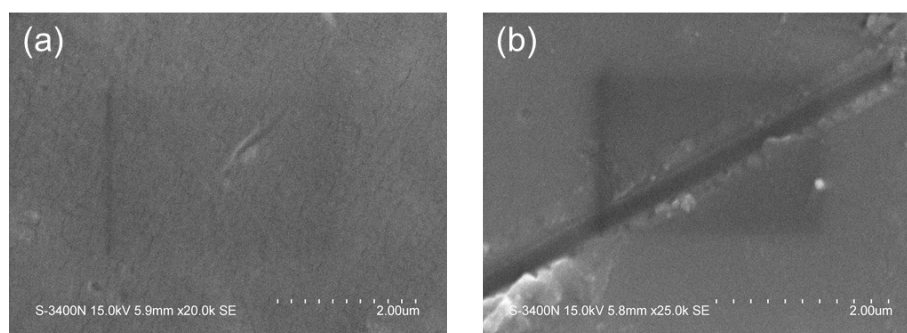

**Figure S7.** SEM images of drop-casted P2 thin-film.

# Quantification of the full P3HT (P1) spectrum (Figure S8)

## Experiment P1

### Processing parameters

| mzRange     | mzOffset | ppmDev | resolution | minRelAbundance |
|-------------|----------|--------|------------|-----------------|
| [500, 3000] | 0.0      | 100    | 1500       | 0.01            |

| endgroupPairs | monomers | adduction | charge |
|---------------|----------|-----------|--------|
| HH            | 3HT      | +         | 1      |
| HBr           |          |           |        |
| BrBr          |          |           |        |

### Matching overview

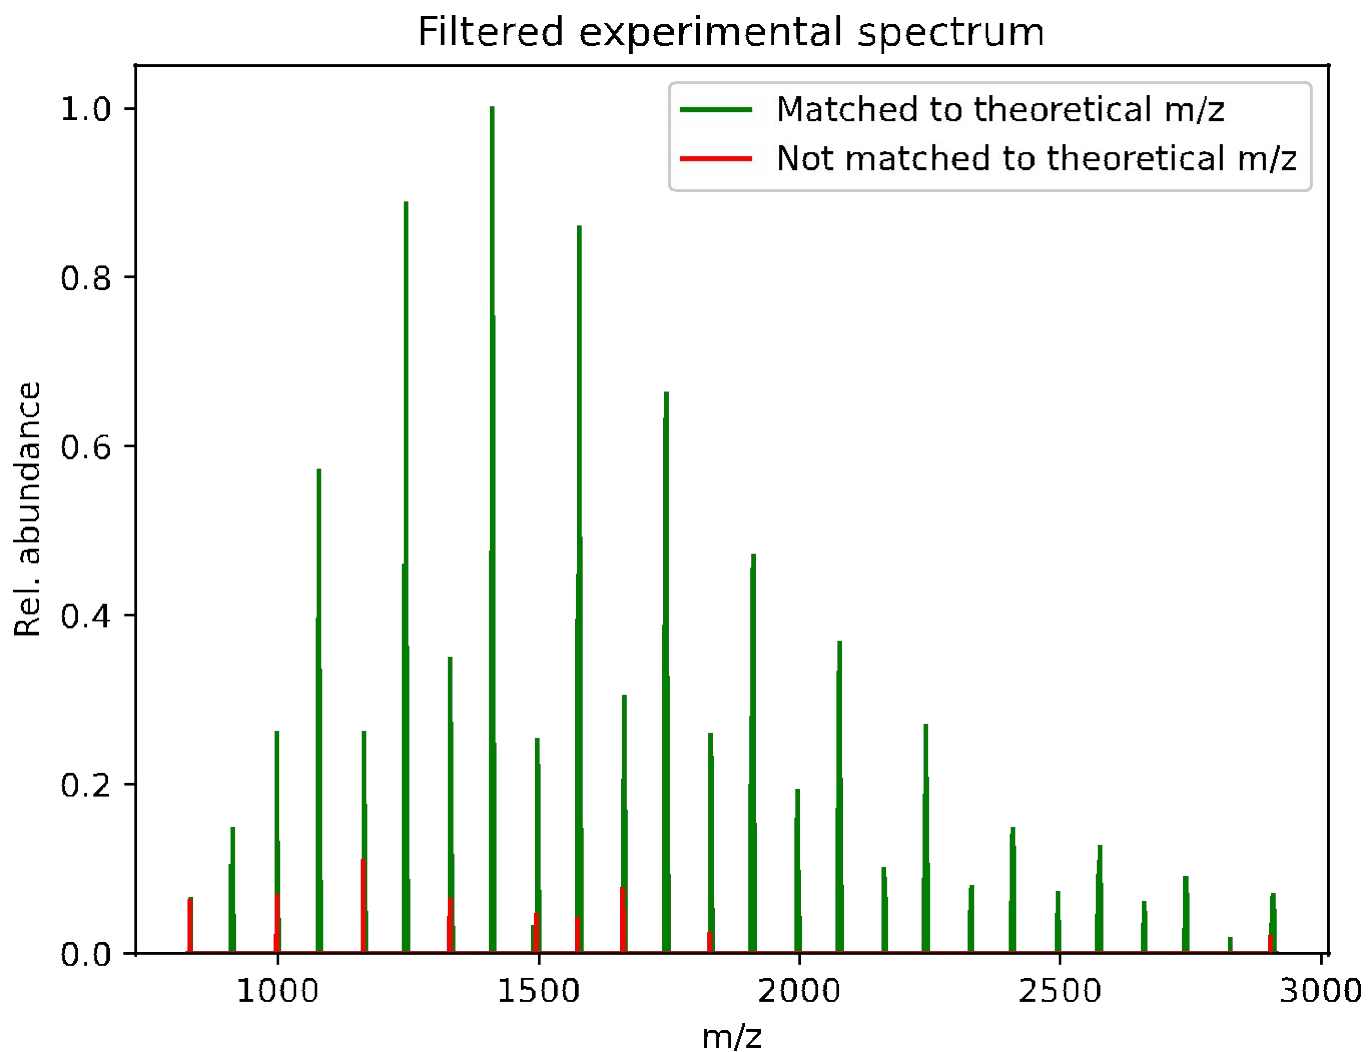

# Experimental vs. calculated spectrum

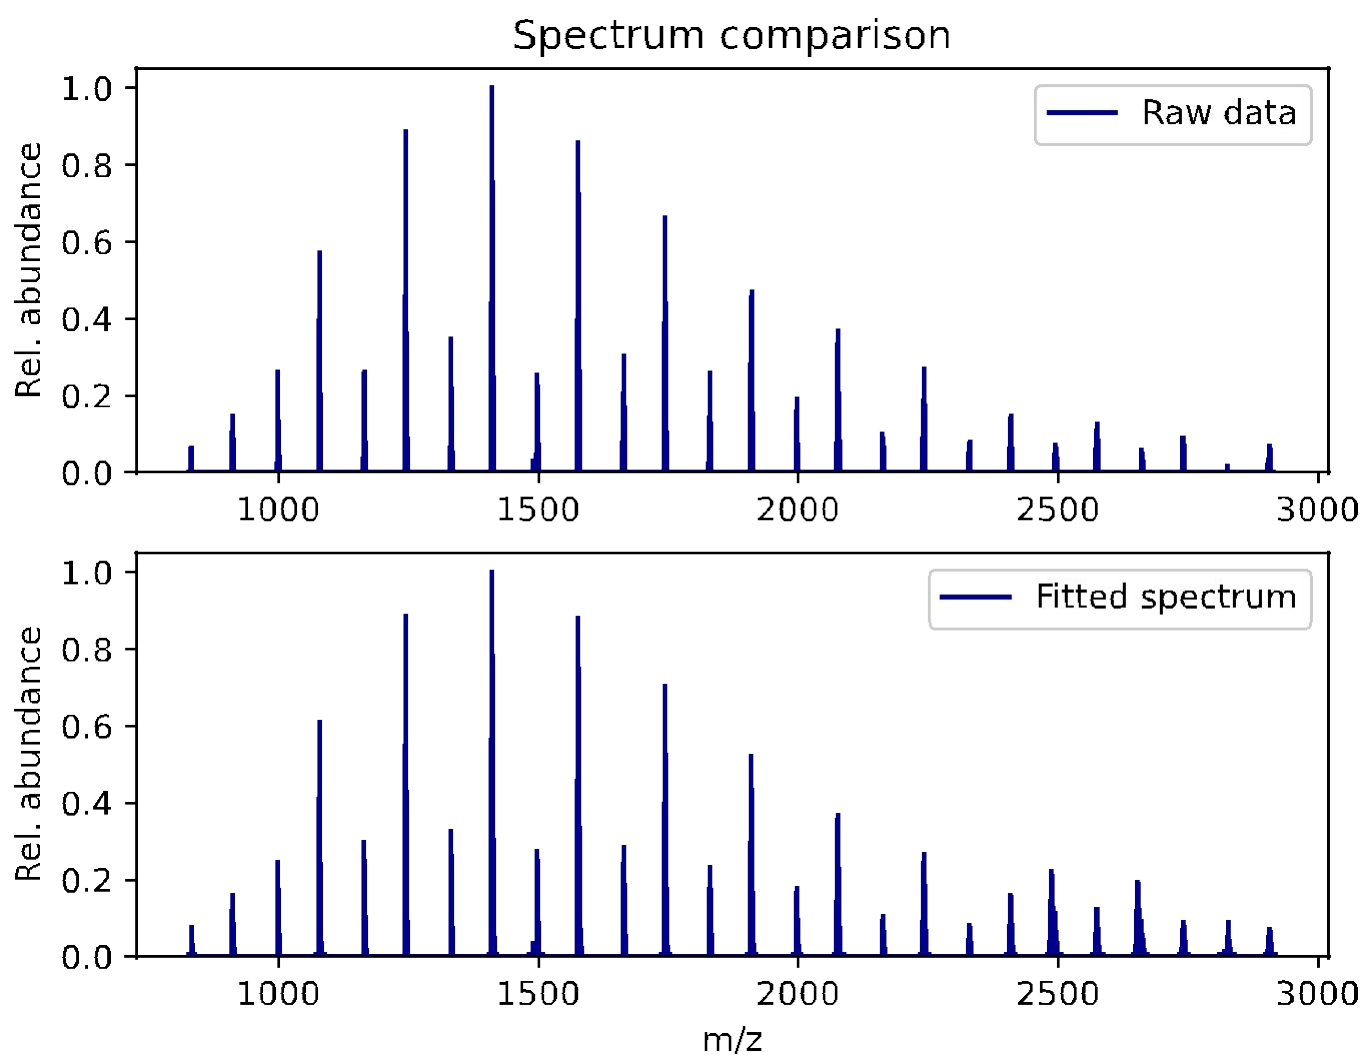

## Identified species

| Polymer composition |           |               |        | Matched peaks         |                  |            |                |
|---------------------|-----------|---------------|--------|-----------------------|------------------|------------|----------------|
| Monomers            | Endgroups | Formula & ion | Amount | Most abundant isotope | m/z (exp+offset) | m/z (calc) | $\Delta$ (ppm) |
| [5]                 | HH        | H72C50S5      | 0.04   | 832.4232              | 832.4283         | 832.4232   | 6.10           |
|                     |           |               |        |                       | 833.4273         | 833.4263   | 1.21           |
| [5]                 | HBr       | H71Br1C50S5   | 0.13   | 912.3323              | 910.3452         | 910.3337   | 12.62          |
|                     |           |               |        |                       | 911.3445         | 911.3368   | 8.49           |
|                     |           |               |        |                       | 912.3453         | 912.3323   | 14.25          |
|                     |           |               |        |                       | 913.3541         | 913.3348   | 21.14          |
|                     |           |               |        |                       | 914.3324         | 914.3319   | 0.50           |
| [6]                 | HH        | H86C60S6      | 0.16   | 998.5048              | 998.5175         | 998.5048   | 12.64          |
|                     |           |               |        |                       | 999.5135         | 999.5079   | 5.57           |
|                     |           |               |        |                       | 1000.5157        | 1000.5056  | 10.13          |

| Polymer composition |           |               |        | Matched peaks         |                  |            |                |
|---------------------|-----------|---------------|--------|-----------------------|------------------|------------|----------------|
| Monomers            | Endgroups | Formula & ion | Amount | Most abundant isotope | m/z (exp+offset) | m/z (calc) | $\Delta$ (ppm) |
| [6]                 | HBr       | H85Br1C60S6   | 0.53   | 1078.4142             | 1001.5287        | 1001.5059  | 22.82          |
|                     |           |               |        |                       | 1076.4325        | 1076.4153  | 15.93          |
|                     |           |               |        |                       | 1077.4272        | 1077.4184  | 8.18           |
|                     |           |               |        |                       | 1078.4261        | 1078.4142  | 11.03          |
|                     |           |               |        |                       | 1079.4299        | 1079.4164  | 12.55          |
|                     |           |               |        |                       | 1080.4220        | 1080.4140  | 7.38           |
| [7]                 | HH        | H100C70S7     | 0.23   | 1164.5865             | 1081.4144        | 1081.4144  | 0.06           |
|                     |           |               |        |                       | 1164.5938        | 1164.5865  | 6.27           |
|                     |           |               |        |                       | 1165.5959        | 1165.5896  | 5.46           |
|                     |           |               |        |                       | 1166.5958        | 1166.5876  | 7.07           |
|                     |           |               |        |                       | 1167.6074        | 1167.5880  | 16.61          |
|                     |           |               |        |                       | 1168.5864        | 1168.5866  | 0.18           |
| [7]                 | HBr       | H99Br1C70S7   | 0.83   | 1244.4962             | 1242.5046        | 1242.4970  | 6.18           |
|                     |           |               |        |                       | 1243.5060        | 1243.5001  | 4.73           |
|                     |           |               |        |                       | 1244.5087        | 1244.4962  | 10.03          |
|                     |           |               |        |                       | 1245.5111        | 1245.4982  | 10.37          |
|                     |           |               |        |                       | 1246.5082        | 1246.4963  | 9.56           |
|                     |           |               |        |                       | 1247.5127        | 1247.4965  | 13.00          |
| [8]                 | HH        | H114C80S8     | 0.29   | 1330.6681             | 1248.5022        | 1248.4951  | 5.67           |
|                     |           |               |        |                       | 1249.5132        | 1249.4943  | 15.09          |
|                     |           |               |        |                       | 1330.6707        | 1330.6681  | 1.94           |
|                     |           |               |        |                       | 1331.6742        | 1331.6712  | 2.24           |
|                     |           |               |        |                       | 1332.6755        | 1332.6697  | 4.40           |
|                     |           |               |        |                       | 1333.6791        | 1333.6699  | 6.86           |
| [8]                 | HBr       | H113Br1C80S8  | 1.00   | 1410.5782             | 1334.6730        | 1334.6687  | 3.21           |
|                     |           |               |        |                       | 1335.6719        | 1335.6678  | 3.05           |
|                     |           |               |        |                       | 1408.5840        | 1408.5786  | 3.83           |
|                     |           |               |        |                       | 1409.5918        | 1409.5817  | 7.15           |
|                     |           |               |        |                       | 1410.5873        | 1410.5782  | 6.45           |
|                     |           |               |        |                       | 1411.5859        | 1411.5799  | 4.26           |
| [8]                 | BrBr      | Br2C80H112S8  | 0.04   | 1488.4881             | 1412.5864        | 1412.5784  | 5.70           |
|                     |           |               |        |                       | 1413.5824        | 1413.5784  | 2.84           |
| [9]                 | HH        | H128C90S9     | 0.27   | 1497.7528             | 1414.5867        | 1414.5771  | 6.75           |
|                     |           |               |        |                       | 1488.5142        | 1488.4881  | 17.53          |
|                     |           |               |        |                       | 1496.7572        | 1496.7497  | 5.01           |
|                     |           |               |        |                       | 1497.7592        | 1497.7528  | 4.23           |
|                     |           |               |        |                       | 1498.7493        | 1498.7516  | 1.56           |
|                     |           |               |        |                       | 1499.7559        | 1499.7518  | 2.70           |
|                     |           |               |        |                       | 1500.7556        | 1500.7510  | 3.10           |

| Polymer composition |           |                |        | Matched peaks         |                  |            |                |
|---------------------|-----------|----------------|--------|-----------------------|------------------|------------|----------------|
| Monomers            | Endgroups | Formula & ion  | Amount | Most abundant isotope | m/z (exp+offset) | m/z (calc) | $\Delta$ (ppm) |
| [9]                 | HBr       | H127Br1C90S9   | 0.95   | 1576.6601             | 1574.6683        | 1574.6602  | 5.16           |
|                     |           |                |        |                       | 1575.6671        | 1575.6633  | 2.40           |
|                     |           |                |        |                       | 1576.6732        | 1576.6601  | 8.30           |
|                     |           |                |        |                       | 1577.6677        | 1577.6617  | 3.84           |
|                     |           |                |        |                       | 1578.6698        | 1578.6604  | 5.93           |
|                     |           |                |        |                       | 1579.6694        | 1579.6603  | 5.79           |
|                     |           |                |        |                       | 1580.6681        | 1580.6597  | 5.29           |
| [10]                | HH        | H142C100S10    | 0.30   | 1663.8344             | 1662.8290        | 1662.8313  | 1.41           |
|                     |           |                |        |                       | 1663.8304        | 1663.8344  | 2.41           |
|                     |           |                |        |                       | 1664.8318        | 1664.8335  | 1.02           |
|                     |           |                |        |                       | 1665.8373        | 1665.8337  | 2.17           |
|                     |           |                |        |                       | 1666.8295        | 1666.8330  | 2.09           |
| [10]                | HBr       | H141Br1C100S10 | 0.82   | 1742.7421             | 1740.7421        | 1740.7418  | 0.13           |
|                     |           |                |        |                       | 1741.7451        | 1741.7450  | 0.09           |
|                     |           |                |        |                       | 1742.7483        | 1742.7421  | 3.58           |
|                     |           |                |        |                       | 1743.7482        | 1743.7434  | 2.72           |
|                     |           |                |        |                       | 1744.7472        | 1744.7424  | 2.75           |
|                     |           |                |        |                       | 1745.7482        | 1745.7424  | 3.33           |
|                     |           |                |        |                       | 1746.7474        | 1746.7417  | 3.26           |
| [11]                | HH        | H156C110S11    | 0.26   | 1830.9153             | 1828.9241        | 1828.9129  | 6.09           |
|                     |           |                |        |                       | 1829.9172        | 1829.9161  | 0.64           |
|                     |           |                |        |                       | 1830.9155        | 1830.9153  | 0.10           |
|                     |           |                |        |                       | 1831.9198        | 1831.9157  | 2.26           |
|                     |           |                |        |                       | 1832.8969        | 1832.9149  | 9.85           |
| [11]                | HBr       | H155Br1C110S11 | 0.65   | 1908.8240             | 1906.8262        | 1906.8235  | 1.43           |
|                     |           |                |        |                       | 1907.8369        | 1907.8266  | 5.42           |
|                     |           |                |        |                       | 1908.8267        | 1908.8240  | 1.40           |
|                     |           |                |        |                       | 1909.8301        | 1909.8252  | 2.53           |
|                     |           |                |        |                       | 1910.8292        | 1910.8243  | 2.56           |
|                     |           |                |        |                       | 1911.8214        | 1911.8244  | 1.54           |
|                     |           |                |        |                       | 1912.8345        | 1912.8235  | 5.76           |
| [12]                | HH        | H170C120S12    | 0.20   | 1996.9972             | 1994.9910        | 1994.9946  | 1.80           |
|                     |           |                |        |                       | 1995.9851        | 1995.9977  | 6.30           |
|                     |           |                |        |                       | 1996.9932        | 1996.9972  | 2.01           |
|                     |           |                |        |                       | 1997.9816        | 1997.9975  | 7.97           |
|                     |           |                |        |                       | 1998.9807        | 1998.9969  | 8.10           |
|                     |           |                |        |                       | 1999.9750        | 1999.9965  | 10.75          |

| Polymer composition |           |                |        |                       | Matched peaks    |            |                |
|---------------------|-----------|----------------|--------|-----------------------|------------------|------------|----------------|
| Monomers            | Endgroups | Formula & ion  | Amount | Most abundant isotope | m/z (exp+offset) | m/z (calc) | $\Delta$ (ppm) |
| [12]                | HBr       | H169Br1C120S12 | 0.48   | 2075.9070             | 2072.8987        | 2072.9051  | 3.08           |
|                     |           |                |        |                       | 2073.9080        | 2073.9082  | 0.12           |
|                     |           |                |        |                       | 2074.8987        | 2074.9059  | 3.47           |
|                     |           |                |        |                       | 2075.9043        | 2075.9070  | 1.31           |
|                     |           |                |        |                       | 2076.9082        | 2076.9063  | 0.93           |
|                     |           |                |        |                       | 2077.8984        | 2077.9062  | 3.75           |
|                     |           |                |        |                       | 2078.8931        | 2078.9054  | 5.95           |
|                     |           |                |        |                       | 2079.9077        | 2079.9050  | 1.28           |
| [13]                | HH        | H184C130S13    | 0.12   | 2163.0790             | 2161.0637        | 2161.0762  | 5.77           |
|                     |           |                |        |                       | 2162.0894        | 2162.0793  | 4.64           |
|                     |           |                |        |                       | 2163.0547        | 2163.0790  | 11.24          |
|                     |           |                |        |                       | 2164.0664        | 2164.0793  | 5.97           |
|                     |           |                |        |                       | 2165.0823        | 2165.0788  | 1.60           |
| [13]                | HBr       | H183Br1C130S13 | 0.36   | 2241.9888             | 2238.9778        | 2238.9867  | 3.98           |
|                     |           |                |        |                       | 2239.9785        | 2239.9898  | 5.05           |
|                     |           |                |        |                       | 2240.9746        | 2240.9878  | 5.87           |
|                     |           |                |        |                       | 2241.9924        | 2241.9888  | 1.62           |
|                     |           |                |        |                       | 2242.9612        | 2242.9882  | 12.03          |
|                     |           |                |        |                       | 2243.9768        | 2243.9882  | 5.08           |
|                     |           |                |        |                       | 2244.9751        | 2244.9874  | 5.46           |
| [14]                | HH        | H198C140S14    | 0.10   | 2329.1608             | 2327.1587        | 2327.1578  | 0.38           |
|                     |           |                |        |                       | 2328.1543        | 2328.1609  | 2.85           |
|                     |           |                |        |                       | 2329.1577        | 2329.1608  | 1.32           |
|                     |           |                |        |                       | 2330.1194        | 2330.1611  | 17.92          |
|                     |           |                |        |                       | 2331.1479        | 2331.1607  | 5.47           |
| [14]                | HBr       | H197Br1C140S14 | 0.22   | 2408.0706             | 2405.0471        | 2405.0683  | 8.81           |
|                     |           |                |        |                       | 2406.0391        | 2406.0714  | 13.46          |
|                     |           |                |        |                       | 2407.0542        | 2407.0696  | 6.42           |
|                     |           |                |        |                       | 2408.0652        | 2408.0706  | 2.24           |
|                     |           |                |        |                       | 2409.0540        | 2409.0700  | 6.68           |
|                     |           |                |        |                       | 2410.0383        | 2410.0701  | 13.16          |
|                     |           |                |        |                       | 2411.0845        | 2411.0694  | 6.24           |
| [14]                | BrBr      | Br2C140H196S14 | 0.33   | 2486.9794             | 2493.2212        | 2492.9764  | 98.20          |
|                     |           |                |        |                       | 2495.2048        | 2494.9744  | 92.35          |
| [15]                | HH        | H212C150S15    | 0.09   | 2495.2426             | 2493.2212        | 2493.2394  | 7.31           |
|                     |           |                |        |                       | 2495.2048        | 2495.2426  | 15.12          |
|                     |           |                |        |                       | 2496.2466        | 2496.2429  | 1.47           |
|                     |           |                |        |                       | 2497.2354        | 2497.2427  | 2.94           |
|                     |           |                |        |                       | 2498.1882        | 2498.2424  | 21.67          |

| Polymer composition |           |                |        | Matched peaks         |                  |            |                |
|---------------------|-----------|----------------|--------|-----------------------|------------------|------------|----------------|
| Monomers            | Endgroups | Formula & ion  | Amount | Most abundant isotope | m/z (exp+offset) | m/z (calc) | $\Delta$ (ppm) |
| [15]                | HBr       | H211Br1C150S15 | 0.18   | 2574.1523             | 2571.1582        | 2571.1499  | 3.21           |
|                     |           |                |        |                       | 2572.1497        | 2572.1531  | 1.33           |
|                     |           |                |        |                       | 2573.1443        | 2573.1515  | 2.80           |
|                     |           |                |        |                       | 2574.1479        | 2574.1523  | 1.71           |
|                     |           |                |        |                       | 2575.1477        | 2575.1520  | 1.66           |
|                     |           |                |        |                       | 2576.1365        | 2576.1519  | 6.00           |
|                     |           |                |        |                       | 2577.1323        | 2577.1514  | 7.41           |
|                     |           |                |        |                       | 2578.1204        | 2578.1510  | 11.89          |
| [15]                | BrBr      | Br2C150H210S15 | 0.30   | 2653.0613             | 2659.2910        | 2659.0579  | 87.66          |
|                     |           |                |        |                       | 2660.2988        | 2660.0584  | 90.37          |
| [16]                | HH        | H226C160S16    | 0.07   | 2661.3243             | 2659.2910        | 2659.3210  | 11.29          |
|                     |           |                |        |                       | 2660.2988        | 2660.3242  | 9.53           |
|                     |           |                |        |                       | 2662.3328        | 2662.3247  | 3.02           |
|                     |           |                |        |                       | 2663.3323        | 2663.3246  | 2.90           |
| [16]                | HBr       | H225Br1C160S16 | 0.13   | 2741.2338             | 2738.1787        | 2738.2347  | 20.44          |
|                     |           |                |        |                       | 2739.2129        | 2739.2333  | 7.47           |
|                     |           |                |        |                       | 2740.2422        | 2740.2341  | 2.95           |
|                     |           |                |        |                       | 2741.2629        | 2741.2338  | 10.62          |
|                     |           |                |        |                       | 2742.2495        | 2742.2338  | 5.74           |
|                     |           |                |        |                       | 2743.2075        | 2743.2333  | 9.40           |
| [16]                | BrBr      | Br2C160H224S16 | 0.02   | 2820.1434             | 2825.3704        | 2825.1405  | 81.37          |
| [17]                | HH        | H240C170S17    | 0.06   | 2828.4065             | 2825.3704        | 2825.4027  | 11.43          |
| [17]                | HBr       | H239Br1C170S17 | 0.10   | 2907.3157             | 2905.3066        | 2905.3152  | 2.94           |
|                     |           |                |        |                       | 2906.3086        | 2906.3159  | 2.51           |
|                     |           |                |        |                       | 2907.3000        | 2907.3157  | 5.37           |
|                     |           |                |        |                       | 2908.3237        | 2908.3156  | 2.79           |
|                     |           |                |        |                       | 2909.2859        | 2909.3154  | 10.13          |

## Isobaric species

No isobaric macromolecules in the simulation...

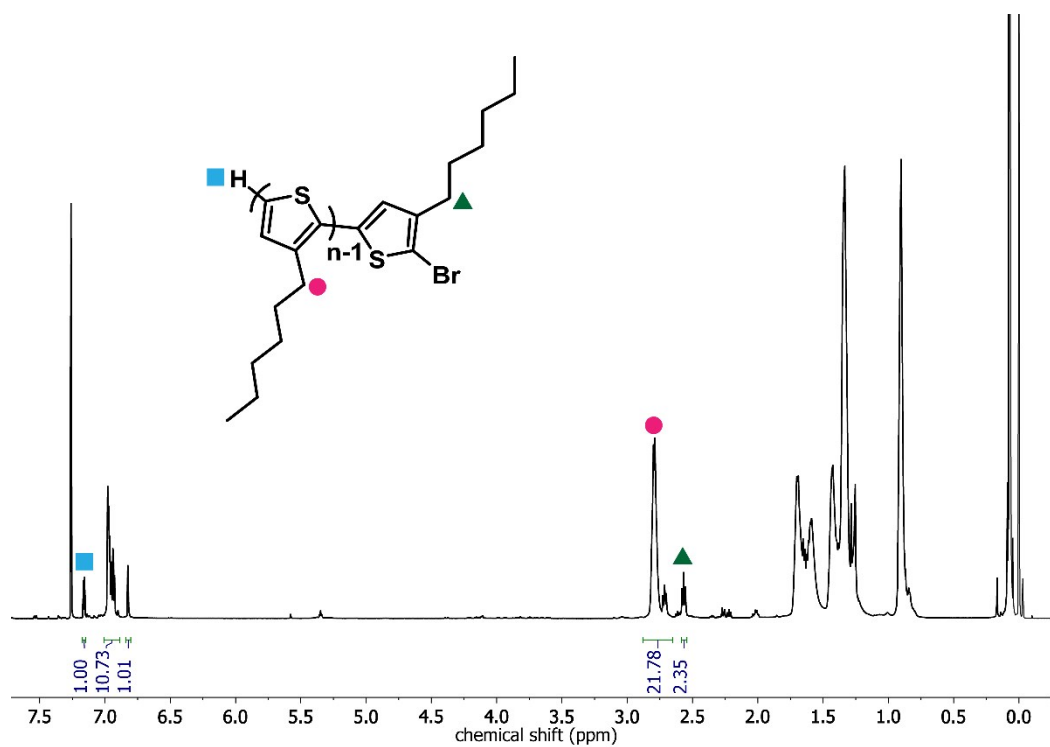

**Figure S9.** <sup>1</sup>H NMR spectrum of P1 in CDCl<sub>3</sub>

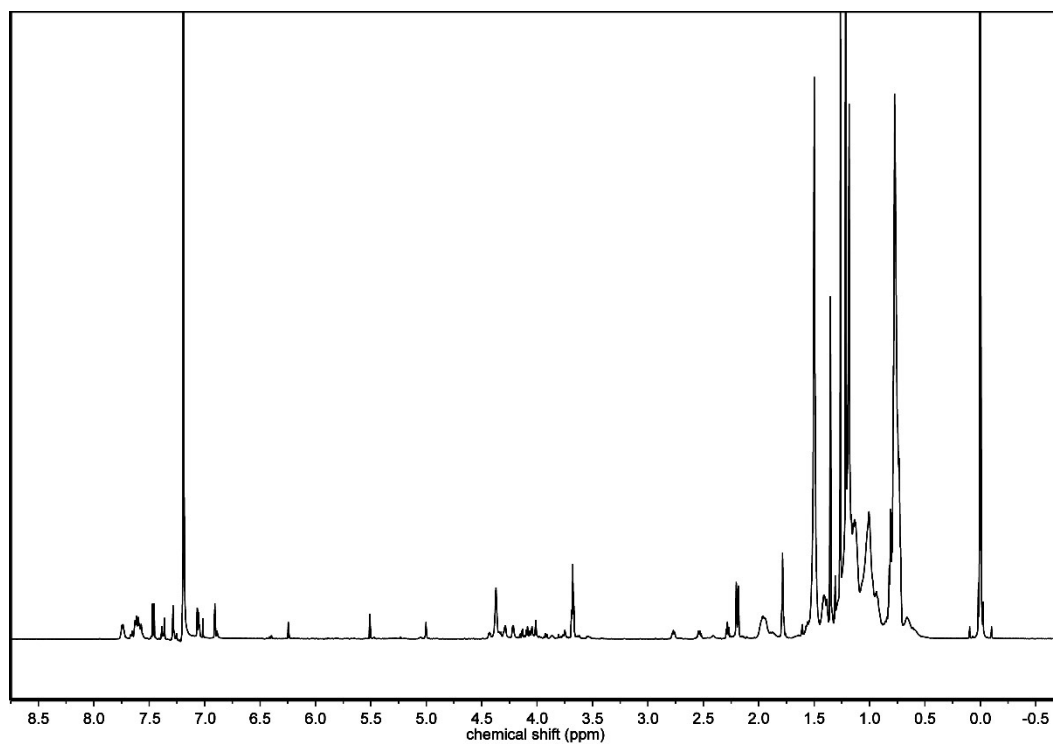

**Figure S10.** <sup>1</sup>H NMR spectrum of P2 in CDCl<sub>3</sub>.



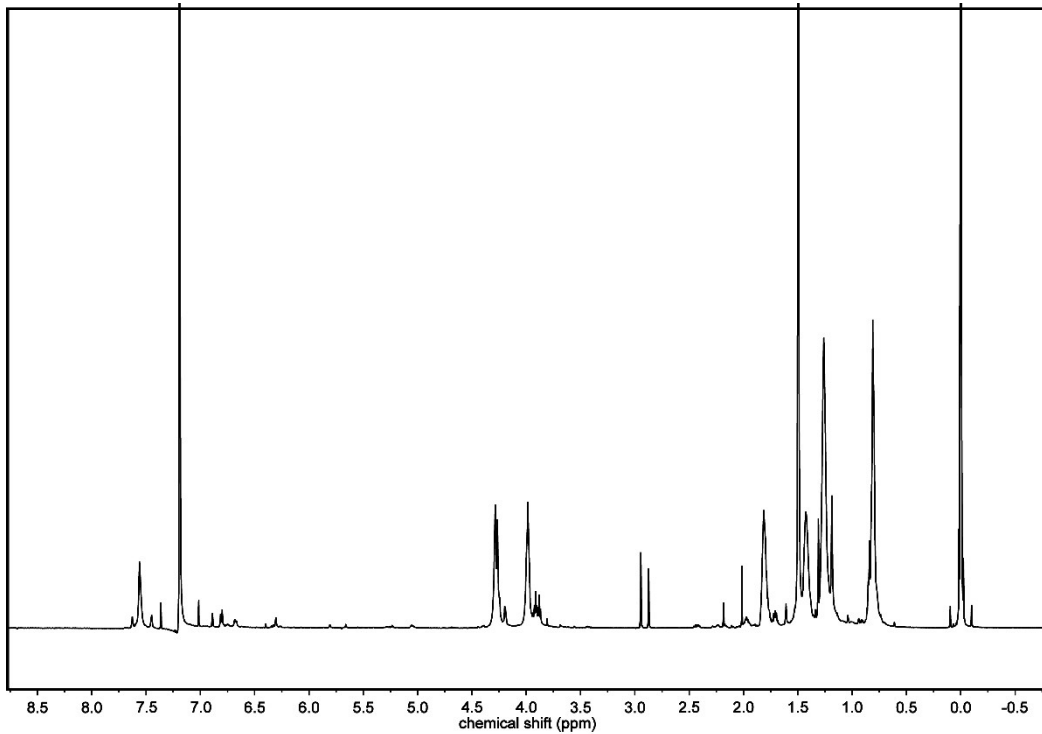

**Figure S11.**  $^1\text{H}$  NMR spectrum of P3 in  $\text{CDCl}_3$ .

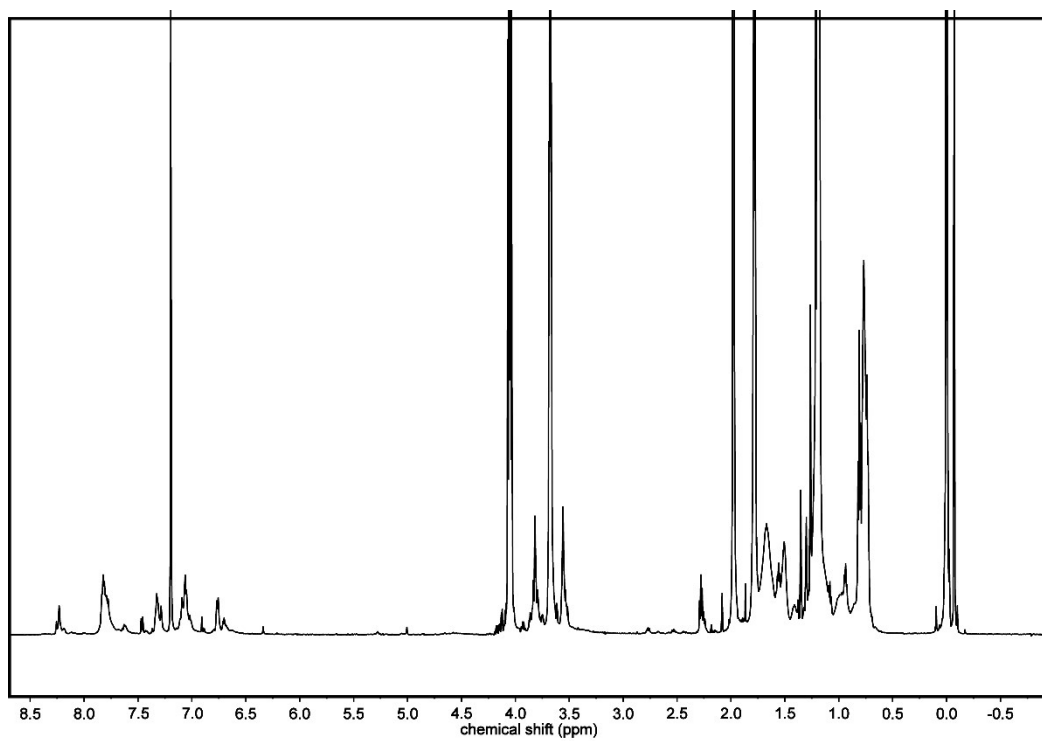

**Figure S12.**  $^1\text{H}$  NMR spectrum of P4 in  $\text{CDCl}_3$ .

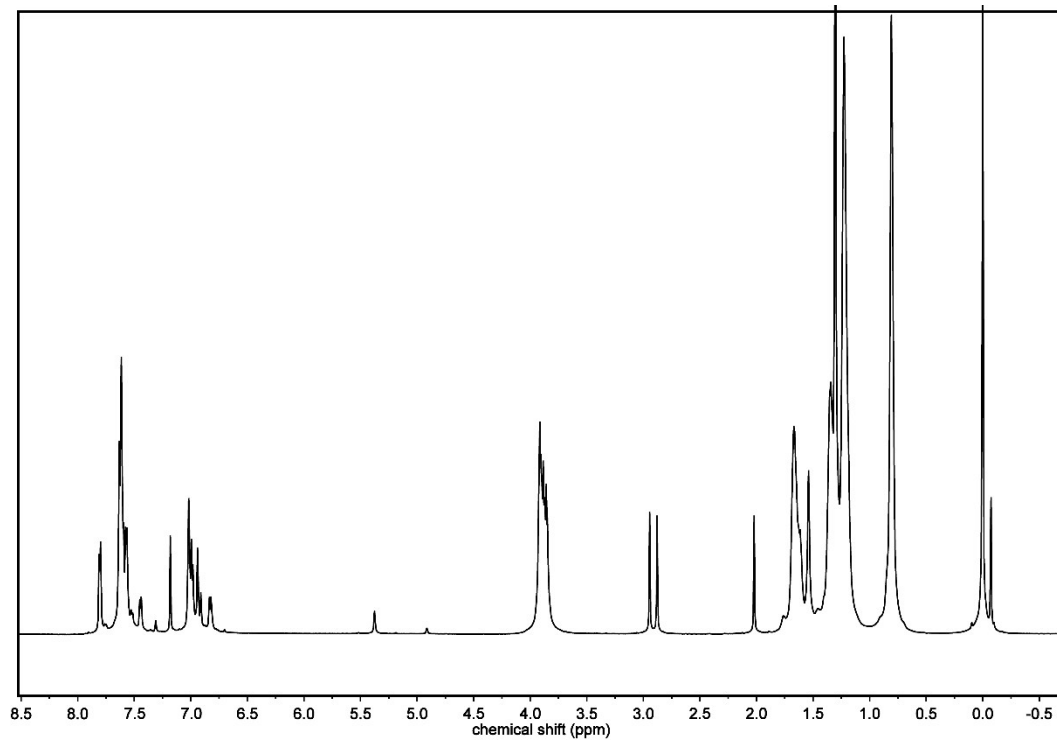

**Figure S13.**  $^1\text{H}$  NMR spectrum of P5 in  $\text{CDCl}_3$ .

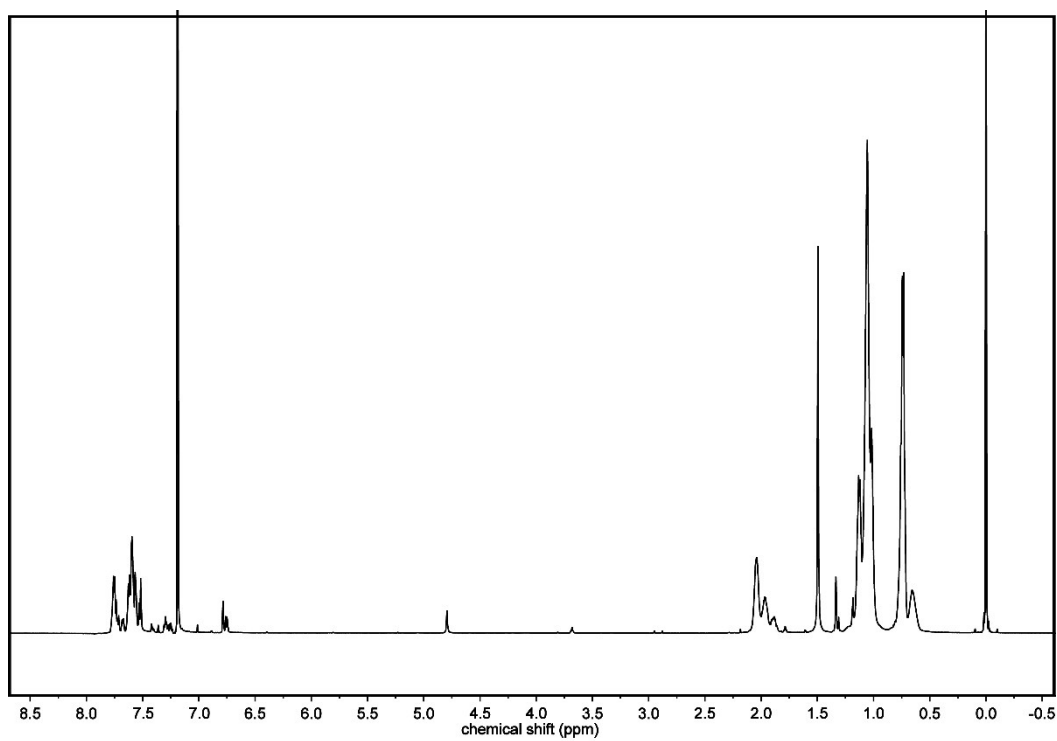

**Figure S14.**  $^1\text{H}$  NMR spectrum of P6 in  $\text{CDCl}_3$ .

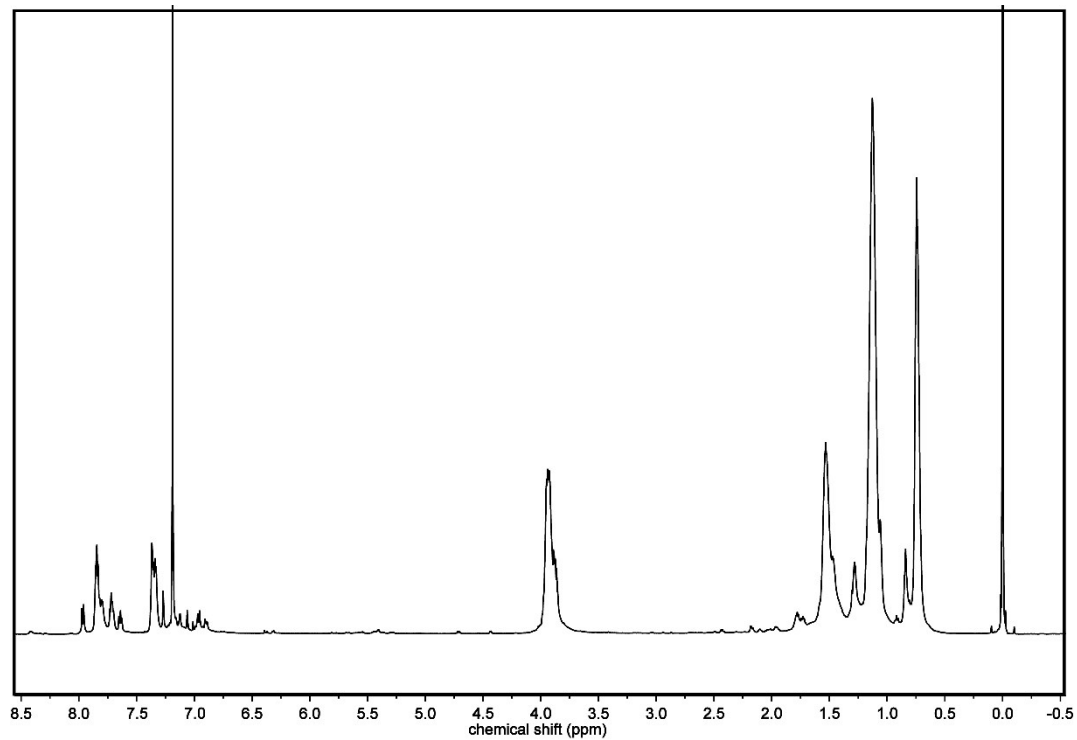

**Figure S15.**  $^1\text{H}$  NMR spectrum of P7 in  $\text{CDCl}_3$ .

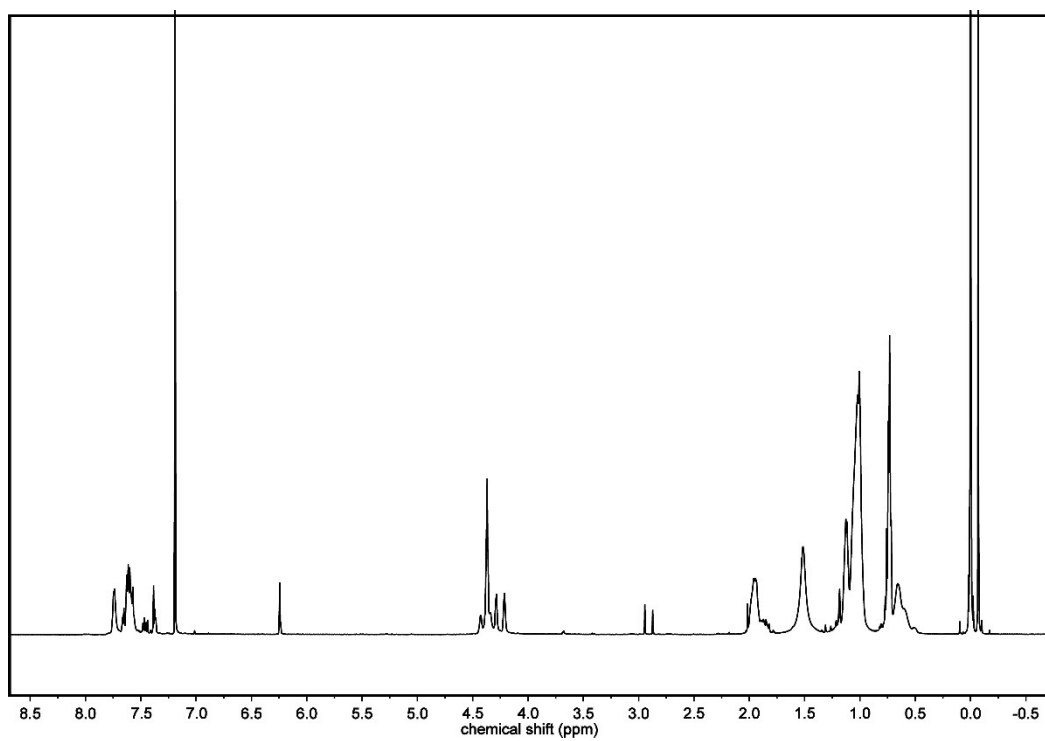

**Figure S16.**  $^1\text{H}$  NMR spectrum of P8 in  $\text{CDCl}_3$ .

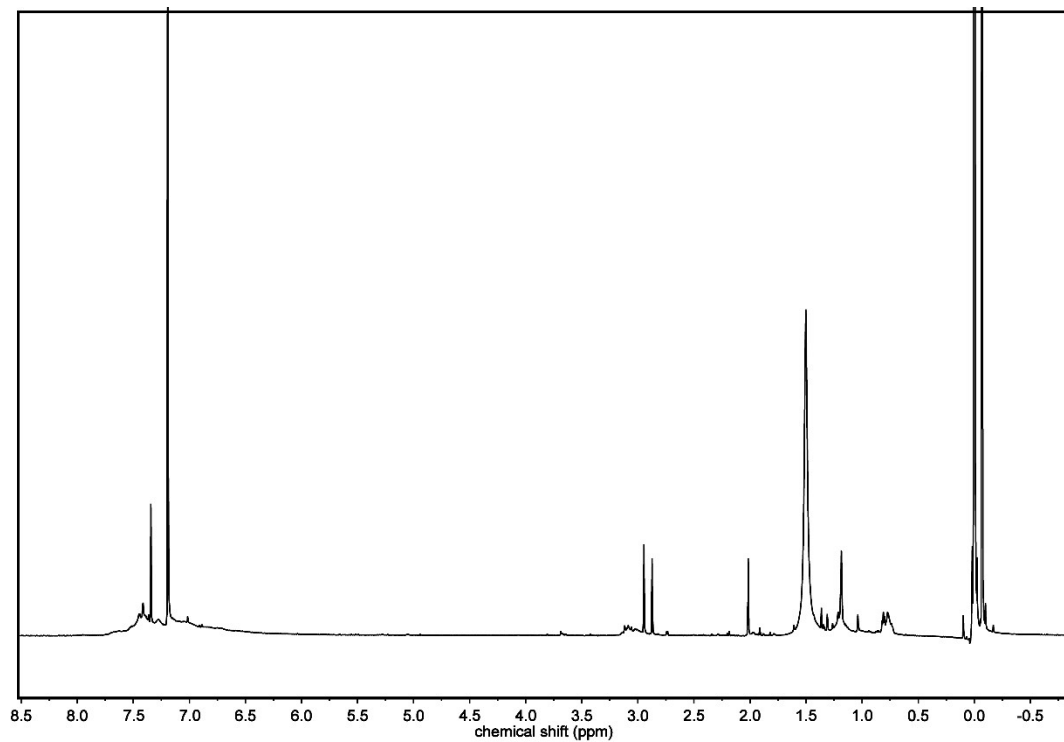

**Figure S17.**  $^1\text{H}$  NMR spectrum of P9 in  $\text{CDCl}_3$ .

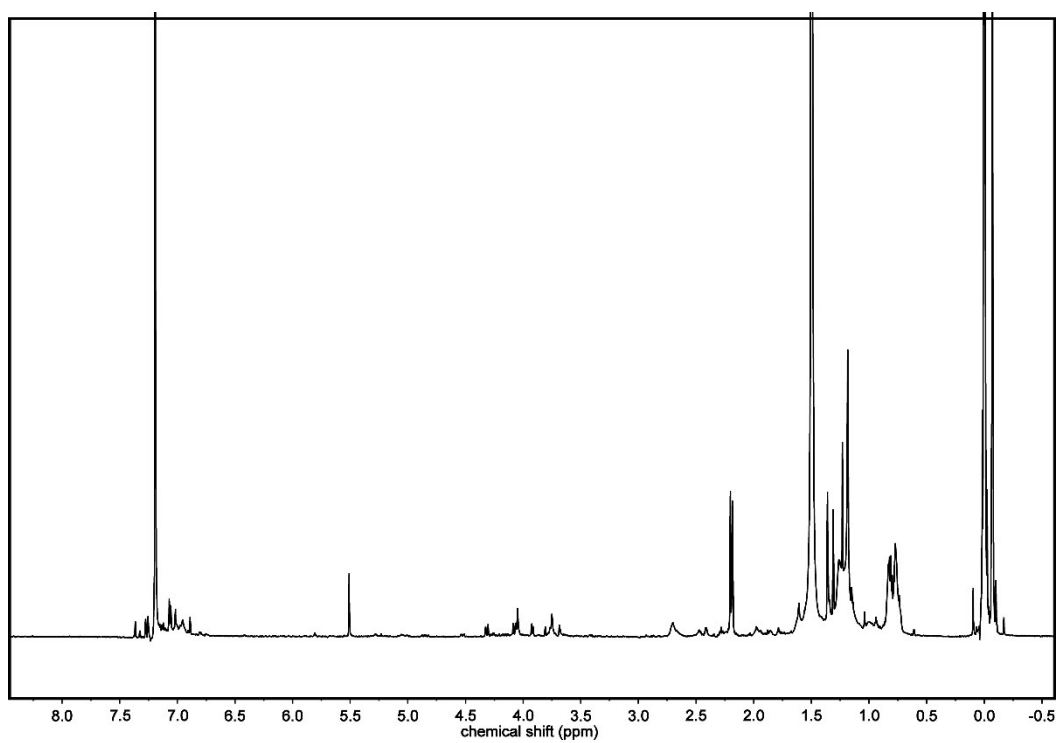

**Figure S18.**  $^1\text{H}$  NMR spectrum of P10 in  $\text{CDCl}_3$ .

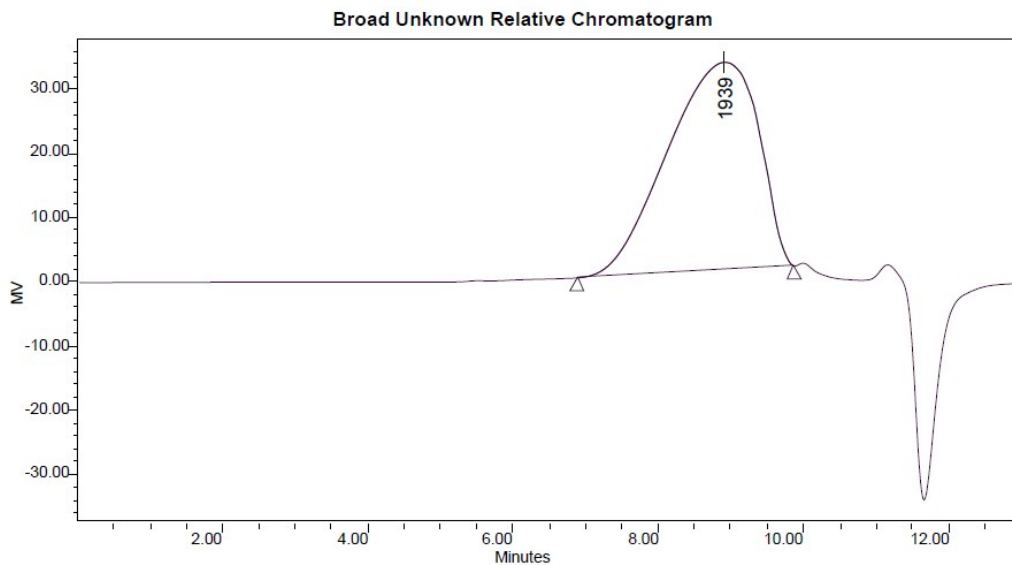

**Broad Unknown Relative Peak Table**

| Distribution Name | Mn (Dalton\$) | Mw (Dalton\$) | MP (Dalton\$) | Mz (Dalton\$) | Mz+1 (Dalton\$) | Polydispersity | Mz/Mw    | Mz+1/Mw  |
|-------------------|---------------|---------------|---------------|---------------|-----------------|----------------|----------|----------|
| 1                 | 2089          | 2871          | 1939          | 3974          | 5249            | 1.374156       | 1.384277 | 1.828400 |

**Figure S19.** GPC curve of P1.

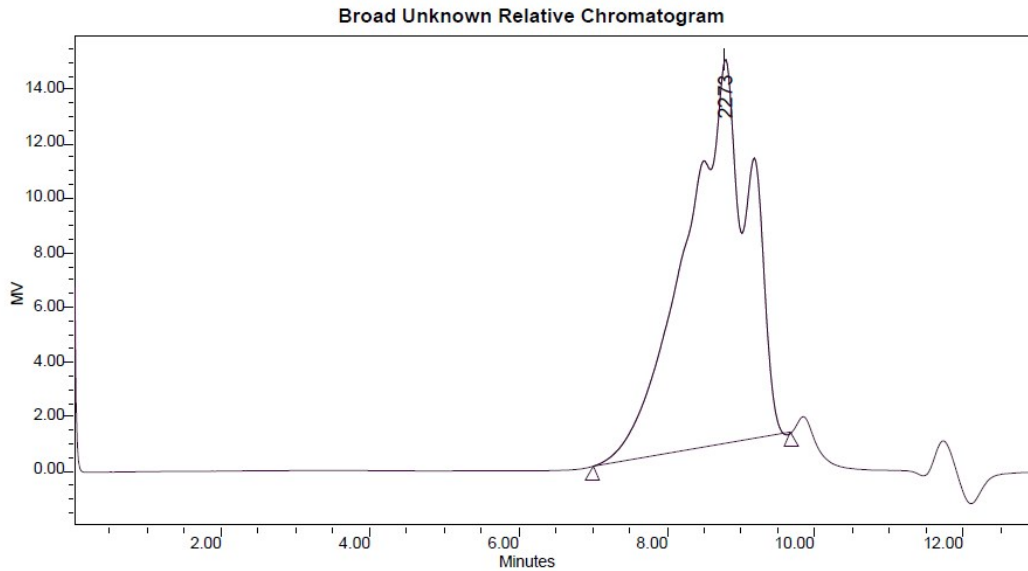

**Broad Unknown Relative Peak Table**

| Distribution Name | Mn (Dalton\$) | Mw (Dalton\$) | MP (Dalton\$) | Mz (Dalton\$) | Mz+1 (Dalton\$) | Polydispersity | Mz/Mw    | Mz+1/Mw  |
|-------------------|---------------|---------------|---------------|---------------|-----------------|----------------|----------|----------|
| 1                 | 2436          | 3089          | 2273          | 4037          | 5230            | 1.267932       | 1.307033 | 1.692955 |

**Figure S20.** GPC curve of P2.

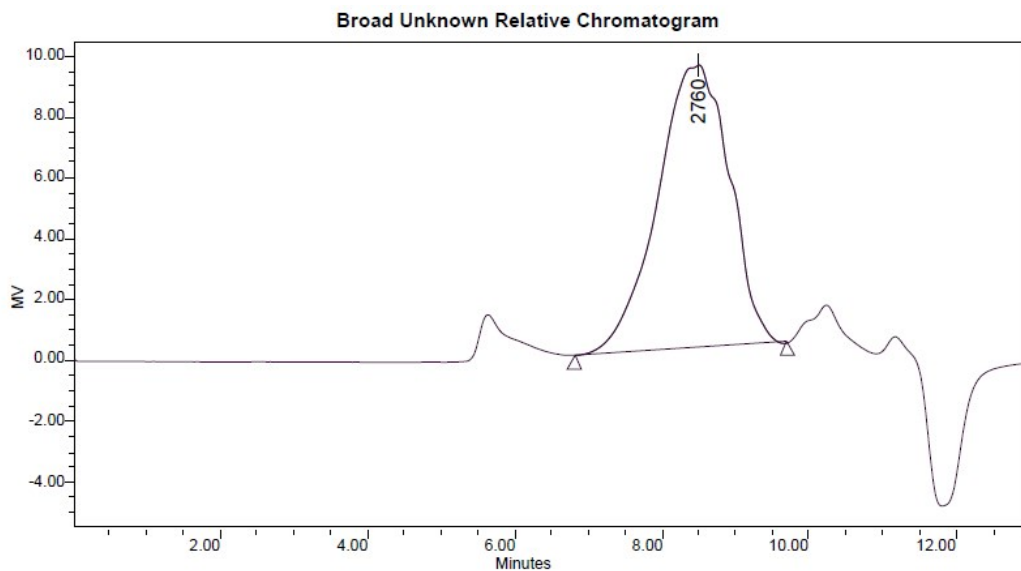

**Broad Unknown Relative Peak Table**

| Distribution Name | Mn (Dalton\$) | Mw (Dalton\$) | MP (Dalton\$) | Mz (Dalton\$) | Mz+1 (Dalton\$) | Polydispersity | Mz/Mw    | Mz+1/Mw  |
|-------------------|---------------|---------------|---------------|---------------|-----------------|----------------|----------|----------|
| 1                 | 2716          | 3345          | 2760          | 4145          | 5100            | 1.231567       | 1.239237 | 1.524729 |

**Figure S21.** GPC curve of P3.

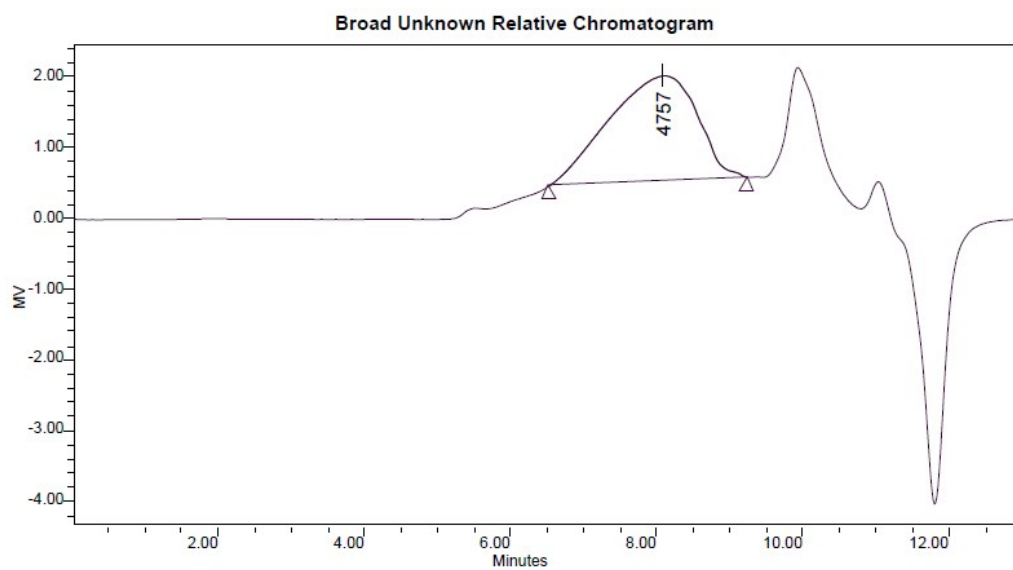

**Broad Unknown Relative Peak Table**

| Distribution Name | Mn (Dalton\$) | Mw (Dalton\$) | MP (Dalton\$) | Mz (Dalton\$) | Mz+1 (Dalton\$) | Polydispersity | Mz/Mw    | Mz+1/Mw  |
|-------------------|---------------|---------------|---------------|---------------|-----------------|----------------|----------|----------|
| 1                 | 5101          | 6816          | 4757          | 9080          | 11499           | 1.336144       | 1.332084 | 1.686994 |

**Figure S22.** GPC curve of P4.

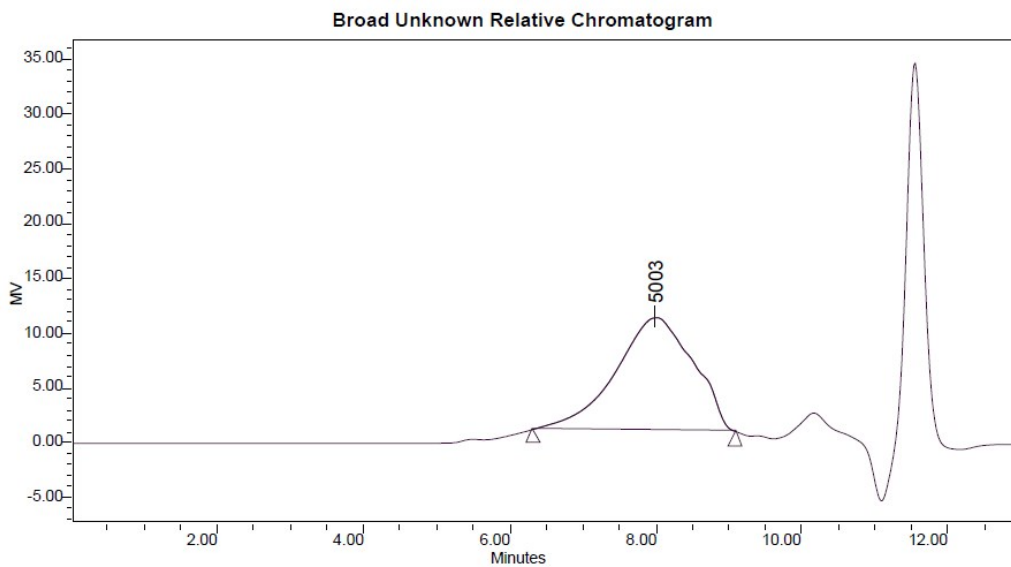

**Broad Unknown Relative Peak Table**

| Distribution Name | Mn (Dalton\$) | Mw (Dalton\$) | MP (Dalton\$) | Mz (Dalton\$) | Mz+1 (Dalton\$) | Polydispersity | Mz/Mw    | Mz+1/Mw  |
|-------------------|---------------|---------------|---------------|---------------|-----------------|----------------|----------|----------|
| 1                 | 4692          | 6064          | 5003          | 8141          | 10961           | 1.292464       | 1.342533 | 1.807463 |

**Figure S23.** GPC curve of P5.

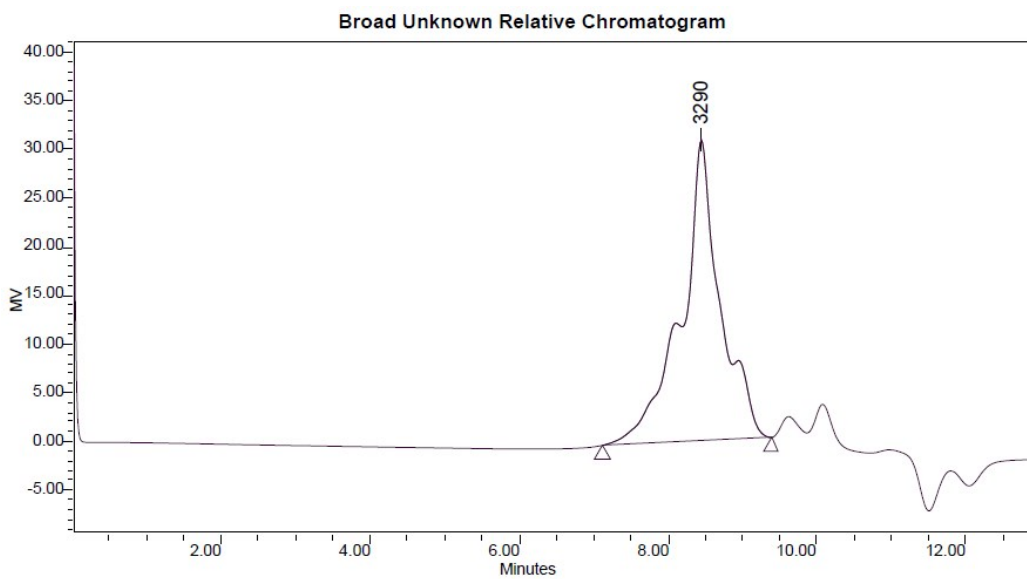

**Broad Unknown Relative Peak Table**

| Distribution Name | Mn (Dalton\$) | Mw (Dalton\$) | MP (Dalton\$) | Mz (Dalton\$) | Mz+1 (Dalton\$) | Polydispersity | Mz/Mw    | Mz+1/Mw  |
|-------------------|---------------|---------------|---------------|---------------|-----------------|----------------|----------|----------|
| 1                 | 3181          | 3656          | 3290          | 4269          | 5044            | 1.149473       | 1.167825 | 1.379712 |

**Figure S24.** GPC curve of P6.

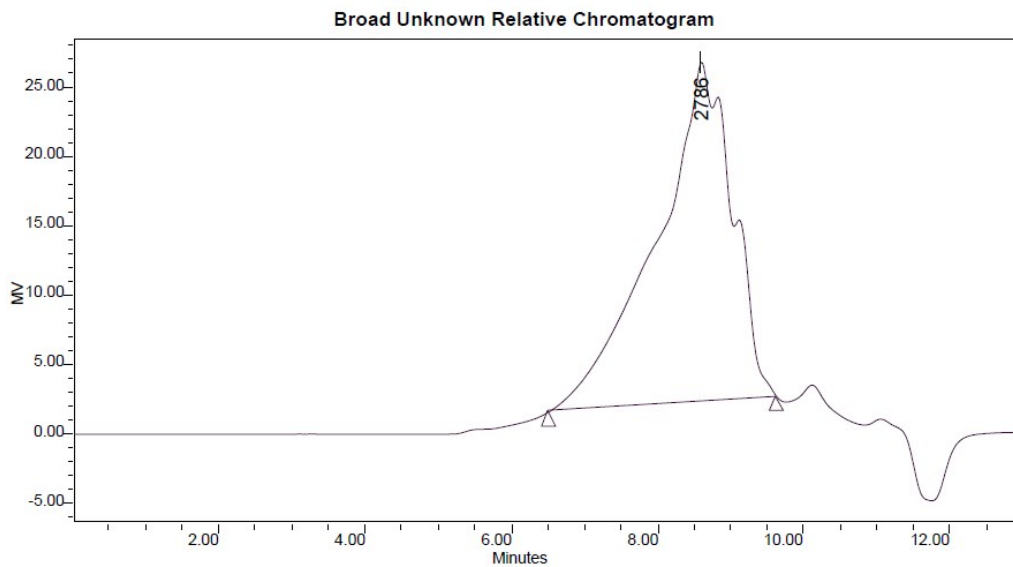

**Broad Unknown Relative Peak Table**

| Distribution Name | Mn (Dalton\$) | Mw (Dalton\$) | MP (Dalton\$) | Mz (Dalton\$) | Mz+1 (Dalton\$) | Polydispersity | Mz/Mw    | Mz+1/Mw  |
|-------------------|---------------|---------------|---------------|---------------|-----------------|----------------|----------|----------|
| 1                 | 2973          | 4305          | 2786          | 6687          | 9788            | 1.448291       | 1.553297 | 2.273642 |

**Figure S25.** GPC curve of P7.

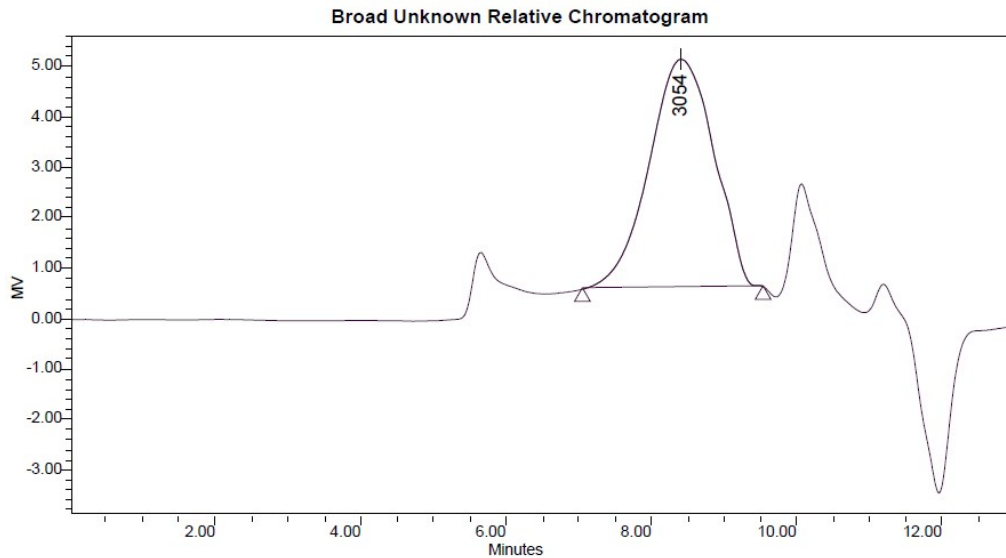

**Broad Unknown Relative Peak Table**

| Distribution Name | Mn (Dalton\$) | Mw (Dalton\$) | MP (Dalton\$) | Mz (Dalton\$) | Mz+1 (Dalton\$) | Polydispersity | Mz/Mw    | Mz+1/Mw  |
|-------------------|---------------|---------------|---------------|---------------|-----------------|----------------|----------|----------|
| 1                 | 2774          | 3299          | 3054          | 3935          | 4667            | 1.189486       | 1.192675 | 1.414468 |

**Figure S26.** GPC curve of P8.



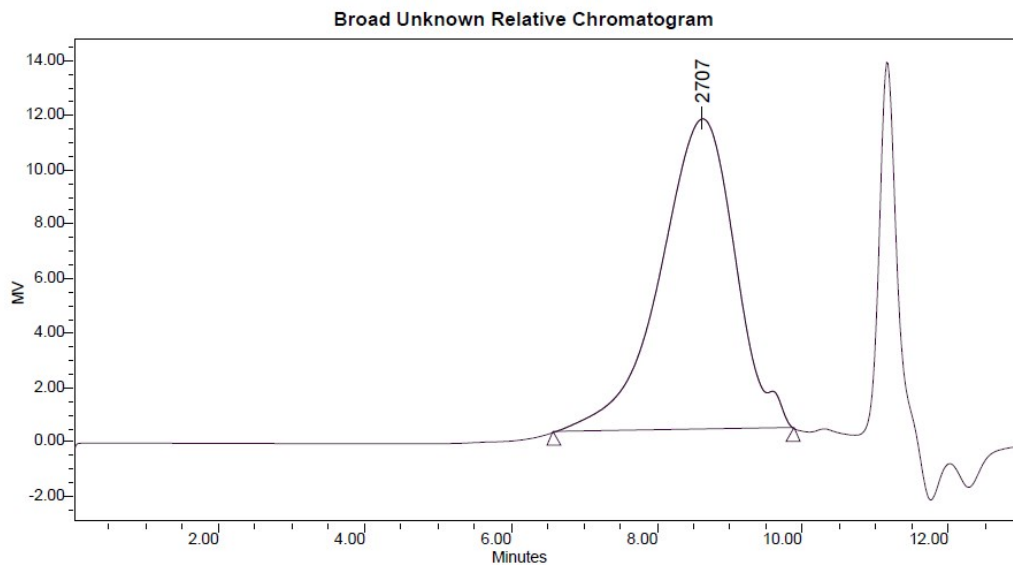

**Broad Unknown Relative Peak Table**

|   | Distribution Name | Mn (Dalton\$) | Mw (Dalton\$) | MP (Dalton\$) | Mz (Dalton\$) | Mz+1 (Dalton\$) | Polydispersity | Mz/Mw    | Mz+1/Mw  |
|---|-------------------|---------------|---------------|---------------|---------------|-----------------|----------------|----------|----------|
| 1 |                   | 2628          | 3567          | 2707          | 5162          | 7675            | 1.357062       | 1.447086 | 2.151688 |

**Figure S27.** GPC curve of P9.

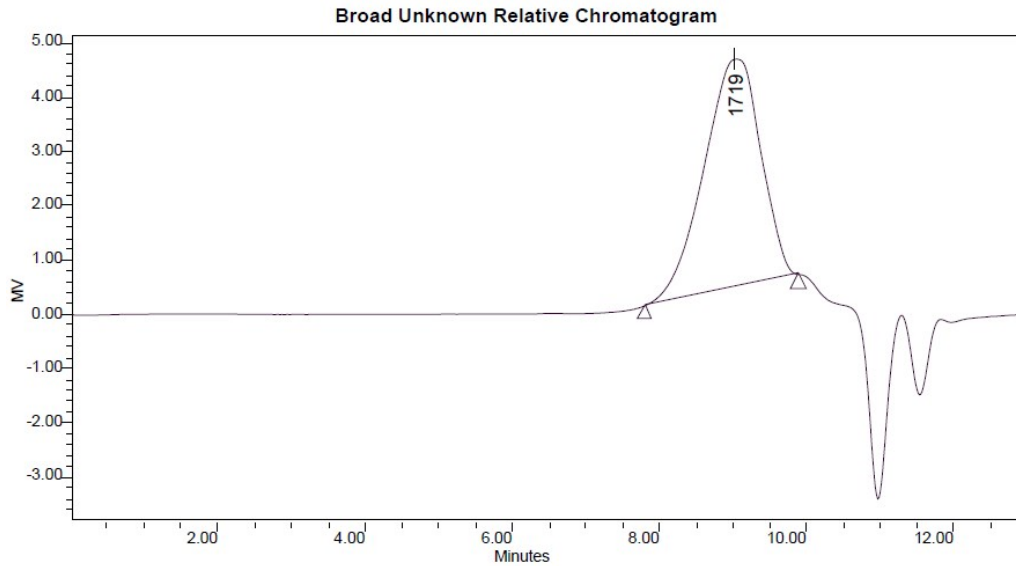

**Broad Unknown Relative Peak Table**

|   | Distribution Name | Mn (Dalton\$) | Mw (Dalton\$) | MP (Dalton\$) | Mz (Dalton\$) | Mz+1 (Dalton\$) | Polydispersity | Mz/Mw    | Mz+1/Mw  |
|---|-------------------|---------------|---------------|---------------|---------------|-----------------|----------------|----------|----------|
| 1 |                   | 1745          | 2008          | 1719          | 2327          | 2691            | 1.150741       | 1.158578 | 1.339753 |

**Figure S28.** GPC curve of P10.

## References:

- (1) Wu, Y.; Ding, M.; Wang, J.; Zhao, B.; Wu, Z.; Zhao, P.; Tian, D.; Ding, Y.; Hu, A. "Controlled Step-Growth Polymerization". *CCS Chemistry* **2020**, *2*, 64-70.
- (2) De Bruycker, K.; Krappitz, T.; Barner-Kowollik, C. "High Performance Quantification of Complex High Resolution Polymer Mass Spectra". *ACS Macro. Lett.* **2018**, 1443-1447.
- (3) Zhang, K.; Xu, L. L.; Jiang, J. G.; Calin, N.; Lam, K. F.; Zhang, S. J.; Wu, H. H.; Wu, G. D.; Albela, B.; Bonnevot, L.; Wu, P. "Facile Large-Scale Synthesis of Monodisperse Mesoporous Silica Nanospheres with Tunable Pore Structure". *J. Am. Chem. Soc.* **2013**, *135*, 2427-2430.
- (4) Han, N.; Woo, H. J.; Kim, S. E.; Jung, S.; Shin, M. J.; Kim, M.; Shin, J. S. "Systemized organic functional group controls in polydiacetylenes and their effects on color changes". *J. Appl. Polym. Sci.* **2017**, *134*, 45011.
- (5) Shu, Z.; Zhang, Q.; Zhang, P.; Qin, Z.; Liu, D.; Gao, X.; Guan, B.; Qi, H.; Xiao, M.; Wei, Z.; Dong, H.; Hu, W. "Preparing two-dimensional crystalline conjugated polymer films by synergetic polymerization and self-assembly at air/water interface". *Polym. Chem.* **2020**, *11*, 1572-1579.
- (6) Zhao, P.; Wang, L.; Wu, Y.; Yang, T.; Ding, Y.; Yang, H. G.; Hu, A. "Hyperbranched Conjugated Polymer Dots: The Enhanced Photocatalytic Activity for Visible Light-Driven Hydrogen Production". *Macromolecules* **2019**, *52*, 4376-4384.
- (7) Nojima, M.; Saito, R.; Ohta, Y.; Yokozawa, T. "Investigation of Mizoroki-Heck coupling polymerization as a catalyst-transfer condensation polymerization for synthesis of poly(p-phenylenevinylene)". *J. Polym. Sci.: Polym. Chem.* **2015**, *53*, 543-551.
- (8) Thavornsinn, N.; Sukwattanasinitt, M.; Wacharasindhu, S. "Direct synthesis of poly(p-phenyleneethynylene)s from calcium carbide". *Polym. Chem.* **2014**, *5*, 48-52.
